# Supplementary material for: Prognostic value of tumor mutational burden in patients with oral cavity squamous cell carcinoma treated with upfront surgery
Source: PubMed Central journal article supplement — ESMO Open. 2021 Jun 9;6(4):100178. doi: 10.1016/j.esmoop.2021.100178 (PMC8207209; doi:10.1016/j.esmoop.2021.100178), 2021-06-09
Supplement: mmc5.pdf [file mmc5.pdf]

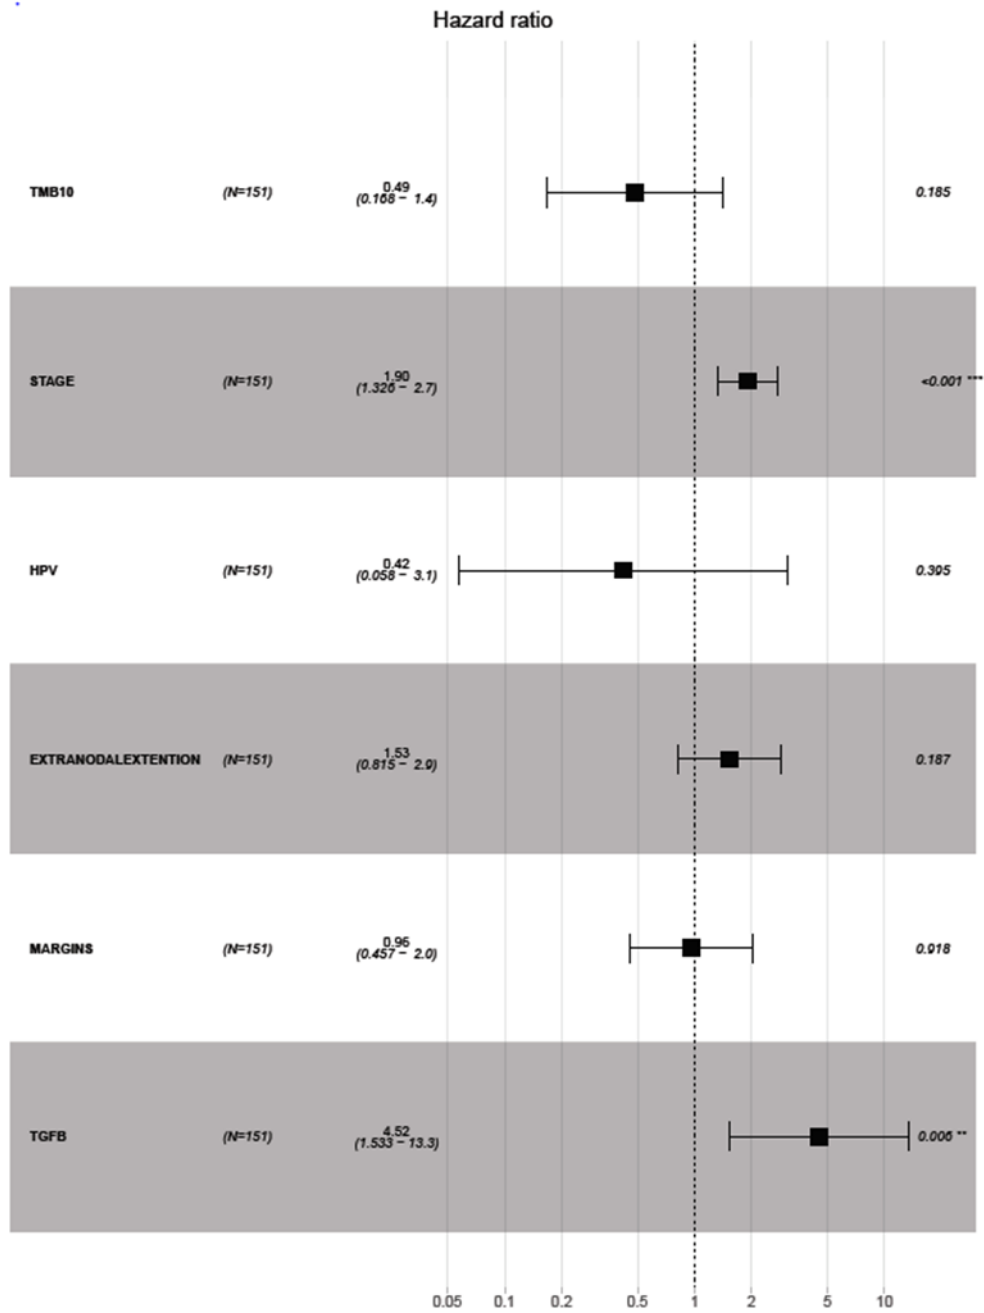

**Supplementary Figure 4a:** Effect of clinical characteristics, TGF $\beta$  and TMB (cut-off 20%) on disease free survival in multivariate analysis.
