# Supplementary material for: Prognostic value of tumor mutational burden in patients with oral cavity squamous cell carcinoma treated with upfront surgery
Source: PubMed Central journal article supplement — ESMO Open. 2021 Jun 9;6(4):100178. doi: 10.1016/j.esmoop.2021.100178 (PMC8207209; doi:10.1016/j.esmoop.2021.100178), 2021-06-09
Supplement: mmc8.pdf [file mmc8.pdf]

**Supplementary Table 1:** Altered genes' classification in signaling pathways

| <b>Pathway</b>       | <b>Genes</b>                                                                                                                                                                                                                                                                                                    |
|----------------------|-----------------------------------------------------------------------------------------------------------------------------------------------------------------------------------------------------------------------------------------------------------------------------------------------------------------|
| Apoptosis            | <i>BCL11B</i><br><i>BCL7C</i><br><i>CASP8</i><br><i>ING1</i><br><i>SAMD9</i>                                                                                                                                                                                                                                    |
| Cell cycle           | <i>CDKN2A</i><br><i>RB1</i>                                                                                                                                                                                                                                                                                     |
| Differentiation cell | <i>FAT1</i><br><i>FAT2</i><br><i>FAT4</i>                                                                                                                                                                                                                                                                       |
| DNA repair           | <i>ATR</i><br><i>BARD1</i><br><i>BRCA1</i><br><i>BRCA2</i><br><i>BRIP1</i><br><i>CDK12</i><br><i>FANCA</i><br><i>FANCC</i><br><i>MLH1</i><br><i>MSH6</i><br><i>MUTYH</i><br><i>POLE</i><br><i>RAD50</i><br><i>RAD51C</i><br><i>SLX4</i><br><i>TP53BP1</i>                                                       |
| Development          | <i>APC2</i><br><i>AXIN2</i><br><i>FBXW7</i><br><i>NOTCH1</i><br><i>NOTCH2</i><br><i>NOTCH3</i><br><i>PTCH1</i><br><i>TCF7L2</i>                                                                                                                                                                                 |
| Epigenetics          | <i>ARID1A</i><br><i>ARID1B</i><br><i>ARID2</i><br><i>ASXL1</i><br><i>ASXL2</i><br><i>BCOR</i><br><i>BRD9</i><br><i>CHD1</i><br><i>CHD3</i><br><i>CREBBP</i><br><i>DNMT3A</i><br><i>EP300</i><br><i>HIST1H3C</i><br><i>KANSL1</i><br><i>KMT2B</i><br><i>KMT2C</i><br><i>KMT2D</i><br><i>NSD1</i><br><i>SETD2</i> |

|                                |                                                                                                                                                                                                   |
|--------------------------------|---------------------------------------------------------------------------------------------------------------------------------------------------------------------------------------------------|
|                                | SMARCA4<br>SMARCB1<br>SMARCC1<br>SUZ12<br>TET2                                                                                                                                                    |
| Genome integrity               | ATM<br>TP53                                                                                                                                                                                       |
| Immunity                       | B2M<br>BCL10<br>CIITA                                                                                                                                                                             |
| Myc                            | MGA                                                                                                                                                                                               |
| Oxidative stress               | KEAP1<br>NFE2L2                                                                                                                                                                                   |
| PI3K                           | PIK3CA<br>PTEN                                                                                                                                                                                    |
| RTK/RAS                        | BRAF<br>ERBB3<br>HRAS<br>KRAS<br>MAPK1<br>NRAS<br>PDGFRA<br>RASA1                                                                                                                                 |
| Senescence                     | TERT                                                                                                                                                                                              |
| TGFβ                           | SMAD3<br>SMAD4<br>TGFB2                                                                                                                                                                           |
| Transcription factor-regulator | CTCF<br>GATA1<br>HNF1A<br>NCOR1<br>PHOX2B<br>RUNX1<br>ZFHX3<br>ZFP36L2                                                                                                                            |
| Other                          | AJUBA<br>ALPK2<br>CHD6<br>CIC<br>CUX1<br>DICER1<br>EPHA2<br>FBXO11<br>FUBP1<br>GNAQ<br>GRIN2A<br>LZTR1<br>MEN1<br>NCKAP1<br>PTPRB<br>PXDNL<br>SDHA<br>SF3B1<br>SPOP<br>SRCAP<br>TBL1XR1<br>THSD7B |

|  |                              |
|--|------------------------------|
|  | <i>U2AF1</i><br><i>ZRSR2</i> |
|--|------------------------------|
