# Supplementary material for: Prognostic value of tumor mutational burden in patients with oral cavity squamous cell carcinoma treated with upfront surgery
Source: PubMed Central journal article supplement — ESMO Open. 2021 Jun 9;6(4):100178. doi: 10.1016/j.esmoop.2021.100178 (PMC8207209; doi:10.1016/j.esmoop.2021.100178), 2021-06-09
Supplement: mmc9.pdf [file mmc9.pdf]

Supplementary Table 2: Details of variants.

| Patient number | Gene     | Type of gene     | Pathway                | Chromosome | Start     | End       | Reference | Alteration   | Location | Type                    | C point                    | P point               | P point         | Closest exon | Depth of coverage S1 | Allelic ratio S1 |
|----------------|----------|------------------|------------------------|------------|-----------|-----------|-----------|--------------|----------|-------------------------|----------------------------|-----------------------|-----------------|--------------|----------------------|------------------|
| 1              | TP53     | TUMOR SUPPRESSOR | GENOME INTEGRITY       | chr17      | 7578406   | 7578406   | C         | T            | exonic   | nonsynonymous_SNV       | c.524G>A                   | p.(Arg175His)         | R175H           | 5            | 3213                 | 32.84            |
| 2              | NFE2L2   | ONCOGENE         | OXYDATIVE STRESS       | chr2       | 178098945 | 178098945 | G         | C            | exonic   | nonsynonymous_SNV       | c.100C>G                   | p.(Arg34Gly)          | R34G            | 2            | 70                   | 25.71            |
| 2              | PIK3CA   | ONCOGENE         | PI3K                   | chr3       | 178916929 | 178916929 | G         | A            | exonic   | nonsynonymous_SNV       | c.316G>A                   | p.(Gly106Ser)         | G106S           | 2            | 48                   | 16.67            |
| 2              | TERT     | ONCOGENE         | SENESCENCE             | chr5       | 1295228   | 1295228   | G         | A            | upstream | NA                      | NA                         | NA                    | 1               | 499          | 14.23                |                  |
| 3              | TP53     | TUMOR SUPPRESSOR | GENOME INTEGRITY       | chr17      | 7577058   | 7577058   | C         | A            | exonic   | stopgain                | c.880G>T                   | p.(Glu294Ter)         | E294X           | 8            | 2618                 | 52.41            |
| 4              | CDKN2A   | TUMOR SUPPRESSOR | CELL CYCLE             | chr9       | 21971191  | 21971191  | GC        | G            | exonic   | frameshift_deletion     | c.167del                   | p.(Ser56ThrfsTer90)   | S56TfsX90       | 2            | 3651                 | 25.42            |
| 4              | TP53     | TUMOR SUPPRESSOR | GENOME INTEGRITY       | chr17      | 7578439   | 7578440   | T         | TTGTAGATGGCC | exonic   | frameshift_deletion     | c.480_490dup               | p.(Lys164ArgfsTer10)  | K164RfsX10      | 5            | 5765                 | 8.05             |
| 4              | UZAF1    | ONCOGENE         | OTHER                  | chr21      | 44524486  | 44524486  | G         | G            | exonic   | nonsynonymous_SNV       | c.71T>C                    | p.(Ile24Thr)          | I24T            | 2            | 83                   | 25.3             |
| 4              | TERT     | ONCOGENE         | SENESCENCE             | chr5       | 1295250   | 1295250   | G         | A            | upstream | NA                      | NA                         | NA                    | 1               | 494          | 68.83                |                  |
| 5              | KMT2B    | TUMOR SUPPRESSOR | EPIGENETIC             | chr19      | 36213970  | 36213971  | T         | TG           | exonic   | frameshift_insertion    | c.2801dup                  | p.(Glu935ArgfsTer60)  | E935RfsX60      | 6            | 3043                 | 12.39            |
| 5              | TP53     | TUMOR SUPPRESSOR | GENOME INTEGRITY       | chr17      | 7578508   | 7578508   | C         | T            | exonic   | nonsynonymous_SNV       | c.422G>A                   | p.(Cys141Tyr)         | C141Y           | 5            | 2181                 | 16.74            |
| 5              | TERT     | ONCOGENE         | SENESCENCE             | chr5       | 1295228   | 1295228   | G         | A            | upstream | NA                      | NA                         | NA                    | 1               | 544          | 25.74                |                  |
| 6              | TFE2L2   | TUMOR SUPPRESSOR | EPIGENETIC             | chr4       | 106164076 | 106164076 | TG        | T            | exonic   | frameshift_deletion     | c.3586del                  | p.(Ala1196LeufsTer30) | A1196LfsX30     | 5            | 245                  | 5.71             |
| 6              | TP53     | TUMOR SUPPRESSOR | GENOME INTEGRITY       | chr17      | 7577538   | 7577538   | C         | T            | exonic   | nonsynonymous_SNV       | c.743G>A                   | p.(Arg248Gln)         | R248Q           | 7            | 2558                 | 11.85            |
| 6              | NCKAP1   | TUMOR SUPPRESSOR | OTHER                  | chr2       | 183822240 | 183822240 | TC        | T            | exonic   | frameshift_deletion     | c.1984del                  | p.(Glu662LysfsTer10)  | E662KfsX10      | 20           | 202                  | 5.94             |
| 7              | NOTCH1   | BOTH             | DEVELOPMENT            | chr9       | 139393364 | 139393370 | C         | C            | exonic   | frameshift_deletion     | c.6161_6167del             | p.(Lys2054SerfsTer55) | K2054SfsX55     | 33           | 3655                 | 12.34            |
| 7              | TP53     | TUMOR SUPPRESSOR | GENOME INTEGRITY       | chr17      | 7577106   | 7577106   | G         | T            | exonic   | nonsynonymous_SNV       | c.832C>A                   | p.(Pro278Thr)         | P278T           | 8            | 1136                 | 5.11             |
| 8              | NOTCH1   | BOTH             | DEVELOPMENT            | chr9       | 139413214 | 139413214 | C         | T            | exonic   | nonsynonymous_SNV       | c.928G>A                   | p.(Gly310Arg)         | G310R           | 6            | 3513                 | 18.47            |
| 8              | TP53     | TUMOR SUPPRESSOR | GENOME INTEGRITY       | chr17      | 7578263   | 7578263   | G         | A            | exonic   | stopgain                | c.586C>T                   | p.(Arg196Ter)         | R196X           | 6            | 3490                 | 14.27            |
| 8              | ZRSR2    | TUMOR SUPPRESSOR | OTHER                  | chrX       | 15841230  | NA        | C         | G            | exonic   | nonframeshift_insertion | c.1314_1315insAGCCGGAGCCGG | p.G438delinsGSRSR     | G438delinsGSRSR | NA           | 696                  | 29               |
| 8              | TERT     | ONCOGENE         | SENESCENCE             | chr5       | 1295228   | 1295228   | G         | A            | upstream | NA                      | NA                         | NA                    | 1               | 349          | 3.88                 |                  |
| 9              | TP53     | TUMOR SUPPRESSOR | GENOME INTEGRITY       | chr17      | 7578855   | 7578855   | G         | A            | exonic   | stopgain                | c.981C>T                   | p.(Gln331Ter)         | G331X           | 9            | 1216                 | 19.49            |
| 9              | TERT     | ONCOGENE         | SENESCENCE             | chr5       | 1295228   | 1295228   | G         | A            | upstream | NA                      | NA                         | NA                    | 1               | 165          | 11.52                |                  |
| 10             | KMT2D    | TUMOR SUPPRESSOR | EPIGENETIC             | chr12      | 49423021  | 49423021  | T         | G            | exonic   | stopgain                | c.14076-2A>T               | p.?                   | ?               | 44           | 1007                 | 40.02            |
| 10             | TP53     | TUMOR SUPPRESSOR | GENOME INTEGRITY       | chr17      | 7579341   | 7579341   | GA        | G            | exonic   | frameshift_deletion     | c.346del                   | p.(Ser116LufsTer7)    | S116LfsX7       | 4            | 882                  | 66.78            |
| 10             | DICER1   | TUMOR SUPPRESSOR | OTHER                  | chr14      | 95557703  | 95557703  | C         | G            | splicing | NA                      | c.5365-1G>C                | p.?                   | ?               | 25           | 217                  | 5.07             |
| 11             | FAT1     | TUMOR SUPPRESSOR | DIFFERENTIATION CELL   | chr4       | 187540375 | 187540376 | GA        | G            | exonic   | frameshift_insertion    | c.7364_7365insGGCC         | p.(His2455GlnfsTer11) | H2455GfsX11     | 10           | 1718                 | 10.71            |
| 11             | TP53     | TUMOR SUPPRESSOR | GENOME INTEGRITY       | chr17      | 7578394   | 7578394   | T         | C            | exonic   | nonsynonymous_SNV       | c.536A>G                   | p.(His179Arg)         | H179R           | 5            | 3439                 | 29.54            |
| 11             | TERT     | ONCOGENE         | SENESCENCE             | chr5       | 1295228   | 1295228   | G         | A            | upstream | NA                      | NA                         | NA                    | 1               | 185          | 9.19                 |                  |
| 12             | CDKN2A   | TUMOR SUPPRESSOR | CELL CYCLE             | chr9       | 21971208  | 21971208  | C         | T            | splicing | NA                      | c.151-1G>A                 | p.?                   | ?               | 2            | 2500                 | 28.56            |
| 12             | FAT2     | TUMOR SUPPRESSOR | DIFFERENTIATION CELL   | chr5       | 150887151 | 150887161 | A         | A            | exonic   | frameshift_deletion     | c.12071_12081del           | p.(Glu4024ValfsTer67) | E4024VfsX67     | 22           | 692                  | 12.72            |
| 12             | NOTCH1   | BOTH             | DEVELOPMENT            | chr9       | 139390923 | 139390923 | G         | C            | exonic   | stopgain                | c.7268C>G                  | p.(Ser2423Ter)        | S2423X          | 34           | 2589                 | 14.29            |
| 12             | NOTCH1   | BOTH             | DEVELOPMENT            | chr9       | 139396523 | 139396523 | G         | C            | exonic   | stopgain                | c.5402C>G                  | p.(Ser1801Ter)        | S1801X          | 29           | 2258                 | 16.25            |
| 12             | BCOR     | TUMOR SUPPRESSOR | EPIGENETIC             | chrX       | 39922984  | 39922984  | G         | A            | exonic   | stopgain                | c.3724C>T                  | p.(Gln1242Ter)        | Q1242X          | 8            | 1336                 | 25.82            |
| 12             | PIK3CA   | ONCOGENE         | PI3K                   | chr3       | 178936091 | 178936091 | G         | A            | exonic   | nonsynonymous_SNV       | c.1633G>A                  | p.(Glu545Lys)         | E545K           | 10           | 25                   | 48               |
| 12             | TERT     | ONCOGENE         | SENESCENCE             | chr5       | 1295228   | 1295228   | G         | A            | upstream | NA                      | NA                         | NA                    | 1               | 257          | 15.56                |                  |
| 13             | TP53     | TUMOR SUPPRESSOR | GENOME INTEGRITY       | chr17      | 7577609   | 7577609   | C         | T            | splicing | NA                      | c.673-1G>A                 | p.?                   | ?               | 7            | 1166                 | 8.23             |
| 13             | TP53     | TUMOR SUPPRESSOR | GENOME INTEGRITY       | chr17      | 7579591   | 7579591   | C         | A            | splicing | NA                      | c.97-1G>T                  | p.?                   | ?               | 4            | 3253                 | 6.27             |
| 13             | CUX1     | TUMOR SUPPRESSOR | OTHER                  | chr7       | 101840058 | 101840058 | T         | G            | exonic   | stopgain                | c.1400T>G                  | p.(Leu467Ter)         | L467X           | 15           | 1574                 | 5.08             |
| 13             | PXDNL    | TUMOR SUPPRESSOR | OTHER                  | chr8       | 52320883  | 52320884  | GA        | GA           | exonic   | frameshift_insertion    | c.3300dup                  | p.(Leu1101SerfsTer10) | L1101SfsX10     | 17           | 983                  | 6.87             |
| 13             | TERT     | ONCOGENE         | SENESCENCE             | chr5       | 1295250   | 1295250   | G         | A            | upstream | NA                      | NA                         | NA                    | 1               | 146          | 8.22                 |                  |
| 14             | TP53     | TUMOR SUPPRESSOR | GENOME INTEGRITY       | chr17      | 7578212   | 7578212   | G         | A            | exonic   | stopgain                | c.637C>T                   | p.(Arg213Ter)         | R213X           | 6            | 2580                 | 11.67            |
| 14             | ZFX3     | TUMOR SUPPRESSOR | CRIPATION FACTOR-REGUL | chr16      | 72821593  | NA        | .         | <DEL>        | exonic   | frameshift_deletion     | c.10570_10582del           | p.G3524fs             | G3524fs         | NA           | 2357                 | 30               |
| 14             | TERT     | ONCOGENE         | SENESCENCE             | chr5       | 1295228   | 1295228   | A         | A            | upstream | NA                      | NA                         | NA                    | 1               | 318          | 7.86                 |                  |
| 15             | TP53     | TUMOR SUPPRESSOR | GENOME INTEGRITY       | chr17      | 7578176   | 7578176   | C         | A            | splicing | NA                      | c.672+1G>T                 | p.?                   | ?               | 6            | 1877                 | 27.65            |
| 15             | AJUBA    | TUMOR SUPPRESSOR | OTHER                  | chr14      | 23445728  | 23445728  | T         | A            | splicing | NA                      | c.1177-1G>A                | p.?                   | ?               | 4            | 1026                 | 33.33            |
| 16             | CHD1     | TUMOR SUPPRESSOR | EPIGENETIC             | chr5       | 98228389  | 98228389  | C         | A            | exonic   | stopgain                | c.2020G>T                  | p.(Glu674Ter)         | E674X           | 14           | 300                  | 5                |
| 16             | KMT2C    | TUMOR SUPPRESSOR | EPIGENETIC             | chr7       | 151864441 | 151864441 | A         | T            | exonic   | stopgain                | c.9540T>A                  | p.(Tyr3180Ter)        | Y3180X          | 42           | 658                  | 27.66            |
| 16             | TP53     | TUMOR SUPPRESSOR | GENOME INTEGRITY       | chr17      | 7578175   | 7578175   | G         | G            | splicing | NA                      | c.672-2T>C                 | p.?                   | ?               | 6            | 1219                 | 28.3             |
| 16             | TP53     | TUMOR SUPPRESSOR | GENOME INTEGRITY       | chr17      | 7578406   | 7578406   | C         | T            | exonic   | nonsynonymous_SNV       | c.524G>A                   | p.(Arg175His)         | R175H           | 5            | 2799                 | 16.65            |
| 16             | ZFP36L2  | TUMOR SUPPRESSOR | CRIPATION FACTOR-REGUL | chr2       | 43452637  | 43452638  | C         | CT           | exonic   | frameshift_insertion    | c.305dup                   | p.(Glu103GlyfsTer23)  | E103GfsX23      | 2            | 1062                 | 5.56             |
| 16             | TERT     | ONCOGENE         | SENESCENCE             | chr5       | 1295228   | 1295228   | G         | A            | upstream | NA                      | NA                         | NA                    | 1               | 249          | 63.45                |                  |
| 17             | CDKN2A   | TUMOR SUPPRESSOR | CELL CYCLE             | chr9       | 21971120  | 21971120  | G         | A            | exonic   | stopgain                | c.238C>T                   | p.(Arg80Ter)          | R80X            | 2            | 2284                 | 66.07            |
| 17             | TP53     | TUMOR SUPPRESSOR | GENOME INTEGRITY       | chr17      | 7573982   | 7573982   | C         | C            | exonic   | stopgain                | c.1045G>T                  | p.(Glu349Ter)         | E349X           | 10           | 922                  | 44.79            |
| 17             | ZFX3     | TUMOR SUPPRESSOR | CRIPATION FACTOR-REGUL | chr16      | 72991896  | NA        | .         | <DEL>        | exonic   | frameshift_deletion     | c.2322_2349del             | p.A774fs              | A774fs          | NA           | 1828                 | 20               |
| 17             | PTEN     | TUMOR SUPPRESSOR | PI3K                   | chr10      | 89682904  | 89682904  | C         | G            | exonic   | nonsynonymous_SNV       | c.388C>G                   | p.(Arg130Gly)         | R130G           | 5            | 23                   | 43.48            |
| 17             | TERT     | ONCOGENE         | SENESCENCE             | chr5       | 1295228   | 1295228   | G         | A            | upstream | NA                      | NA                         | NA                    | 1               | 154          | 20.13                |                  |
| 18             | CDKN2A   | TUMOR SUPPRESSOR | CELL CYCLE             | chr9       | 21971028  | 21971028  | C         | T            | exonic   | stopgain                | c.330G>A                   | p.(Trp110Ter)         | W110X           | 2            | 2811                 | 38.14            |
| 18             | TP53     | TUMOR SUPPRESSOR | GENOME INTEGRITY       | chr17      | 7577538   | 7577538   | C         | T            | exonic   | nonsynonymous_SNV       | c.743G>A                   | p.(Arg248Gln)         | R248Q           | 7            | 1261                 | 26.41            |
| 19             | HIST1H3C | ONCOGENE         | EPIGENETIC             | chr6       | 26045748  | 26045748  | A         | T            | exonic   | nonsynonymous_SNV       | c.110A>T                   | p.(Lys37Met)          | K37M            | 1            | 1118                 | 9.93             |
| 19             | TP53     | TUMOR SUPPRESSOR | GENOME INTEGRITY       | chr17      | 7577081   | 7577081   | T         | C            | exonic   | nonsynonymous_SNV       | c.857A>G                   | p.(Glu286Gly)         | E286G           | 8            | 1018                 | 17.39            |
| 20             | CDKN2A   | TUMOR SUPPRESSOR | CELL CYCLE             | chr9       | 21971120  | 21971120  | G         | A            | exonic   | stopgain                | c.238C>T                   | p.(Arg80Ter)          | R80X            | 2            | 2372                 | 41.78            |
| 20             | NOTCH2   | BOTH             | DEVELOPMENT            | chr1       | 120512357 | 120512357 | G         | T            | exonic   | stopgain                | c.885C>A                   | p.(Cys295Ter)         | C295X           | 6            | 265                  | 29.81            |
| 20             | TP53     | TUMOR SUPPRESSOR | GENOME INTEGRITY       | chr17      | 7577532   | 7577532   | G         | A            | exonic   | nonsynonymous_SNV       | c.749C>T                   | p.(Pro250Leu)         | P250L           | 7            | 996                  | 33.43            |
| 20             | TP53     | TUMOR SUPPRESSOR | GENOME INTEGRITY       | chr17      | 7577538   | 7577538   | C         | T            | exonic   | nonsynonymous_SNV       | c.743G>A                   | p.(Arg248Gln)         | R248Q           | 7            | 1064                 | 17.01            |
| 21             | TP53     | TUMOR SUPPRESSOR | GENOME INTEGRITY       | chr17      | 7577130   | 7577130   | A         | G            | exonic   | nonsynonymous_SNV       | c.808T>C                   | p.(Phe270Leu)         | F270L           | 8            | 485                  | 15.88            |
| 21             | NFE2L2   | ONCOGENE         | OXYDATIVE STRESS       | chr2       | 178098944 | 178098944 | A         | A            | exonic   | nonsynonymous_SNV       | c.101G>T                   | p.(Arg34Leu)          | R34L            | 2            | 93                   | 9.68             |
| 21             | TERT     | ONCOGENE         | SENESCENCE             | chr5       | 1295228   | 1295228   | G         | A            | upstream | NA                      | NA                         | NA                    | 1               | 280          | 13.57                |                  |
| 22             | TP53     | TUMOR SUPPRESSOR | GENOME INTEGRITY       | chr17      | 7579414   | 7579414   | GC        | G            | exonic   | frameshift_deletion     | c.273del                   | p.(Trp91CysfsTer32)   | W91CfsX32       | 4            | 1450                 | 18.28            |
| 22             | TERT     | ONCOGENE         | SENESCENCE             | chr5       | 1295250   | 1295250   | G         | A            | upstream | NA                      | NA                         | NA                    | 1               | 118          | 18.18                |                  |
| 23             | MSH6     | TUMOR SUPPRESSOR | DNA REPAIR             | chr2       | 48026605  | 48026606  | C         | CGA          | exonic   | frameshift_insertion    | c.1484_1485dup             | p.(Cys496AspfsTer15)  | C496DfsX15      | 4            | 1221                 | 32.68            |
| 23             | TP53     | TUMOR SUPPRESSOR | GENOME INTEGRITY       | chr17      | 7578189   | 7578189   | A         | T            | exonic   | stopgain                | c.660T>A                   | p.(Tyr220Ter)         | Y220X           | 6            |                      |                  |

|    |                 |                  |                        |       |           |           |    |       |          |                      |                     |                       |                      |            |      |       |      |
|----|-----------------|------------------|------------------------|-------|-----------|-----------|----|-------|----------|----------------------|---------------------|-----------------------|----------------------|------------|------|-------|------|
| 26 | <i>TERT</i>     | ONCOGENE         | SENESCENCE             | chr5  | 1295228   | 1295228   | G  | A     | upstream | NA                   | NA                  | NA                    | NA                   | 1          | 629  | 17.01 |      |
| 27 | <i>NOTCH1</i>   | BOTH             | DEVELOPMENT            | chr9  | 139440194 | 139440194 | CG | C     | exonic   | frameshift deletion  | c.45del             | p.(Ala16ArgfsTer17)   | A16RfsX17            | 1          | 5014 | 17.11 |      |
| 27 | <i>KMT2B</i>    | TUMOR SUPPRESSOR | EPIGENETIC             | chr19 | 36223997  | 36223997  | GC | C     | exonic   | frameshift deletion  | c.6552del           | p.(Lys2185AsnfsTer18) | K2185NfsX18          | 28         | 2034 | 6.83  |      |
| 27 | <i>BRAF</i>     | ONCOGENE         | RTK/RAS                | chr7  | 140453155 | 140453155 | G  | T     | exonic   | nonsynonymous_SNV    | c.1780G>A           | p.(Asp594Asn)         | D594N                | 15         | 74   | 12.16 |      |
| 27 | <i>TERT</i>     | ONCOGENE         | SENESCENCE             | chr5  | 1295228   | 1295228   | C  | A     | upstream | NA                   | NA                  | NA                    | NA                   | 1          | 796  | 7.66  |      |
| 28 | <i>TP53</i>     | TUMOR SUPPRESSOR | GENOME INTEGRITY       | chr17 | 7571105   | 7571105   | G  | C     | exonic   | nonsynonymous_SNV    | c.833C>G            | p.(Pro278Arg)         | P278R                | 8          | 220  | 34.55 |      |
| 28 | <i>TP53</i>     | TUMOR SUPPRESSOR | GENOME INTEGRITY       | chr17 | 757539    | 757539    | G  | A     | exonic   | nonsynonymous_SNV    | c.742C>T            | p.(Arg248Trp)         | R248W                | 7          | 655  | 12.67 |      |
| 30 | <i>PIK3CA</i>   | ONCOGENE         | PI3K                   | chr3  | 178916891 | 178916891 | G  | T     | exonic   | nonsynonymous_SNV    | c.278G>T            | p.(Arg93Leu)          | R93L                 | 2          | 188  | 5.85  |      |
| 31 | <i>TP53</i>     | TUMOR SUPPRESSOR | GENOME INTEGRITY       | chr17 | 7571110   | 7571110   | AG | A     | exonic   | frameshift deletion  | c.828del            | p.(Cys277ValfsTer68)  | C277VfsX68           | 8          | 236  | 16.95 |      |
| 32 | <i>PTPRB</i>    | TUMOR SUPPRESSOR | OTHER                  | chr12 | 70970327  | 70970327  | G  | A     | exonic   | stopgain             | c.2023G>T           | p.(Glu675Ter)         | E675X                | 9          | 209  | 7.18  |      |
| 32 | <i>TERT</i>     | ONCOGENE         | SENESCENCE             | chr5  | 1295228   | 1295228   | C  | A     | upstream | NA                   | NA                  | NA                    | NA                   | 1          | 621  | 9.18  |      |
| 32 | <i>SMAD4</i>    | TUMOR SUPPRESSOR | TGFβ                   | chr18 | 48591925  | 48591925  | G  | A     | exonic   | nonsynonymous_SNV    | c.1088G>A           | p.(Cys363Tyr)         | C363Y                | 9          | 64   | 26.56 |      |
| 33 | <i>BRCA1</i>    | TUMOR SUPPRESSOR | DNA REPAIR             | chr17 | 41209086  | 41209086  | C  | A     | exonic   | stopgain             | c.5260G>T           | p.(Glu1754Ter)        | E1754X               | 19         | 201  | 6.47  |      |
| 33 | <i>NCOR1</i>    | TUMOR SUPPRESSOR | SCRIPTION FACTOR-REGUL | chr17 | 15989715  | 15989715  | C  | A     | exonic   | stopgain             | c.3058G>T           | p.(Glu1020Ter)        | E1020X               | 23         | 238  | 5.88  |      |
| 33 | <i>HIST1H3C</i> | ONCOGENE         | EPIGENETIC             | chr6  | 26045748  | 26045748  | A  | T     | exonic   | nonsynonymous_SNV    | c.110A>T            | p.(Lys37Met)          | K37M                 | 1          | 2490 | 10.44 |      |
| 33 | <i>TP53</i>     | TUMOR SUPPRESSOR | GENOME INTEGRITY       | chr17 | 7578266   | 7578266   | T  | A     | exonic   | nonsynonymous_SNV    | c.583A>T            | p.(Ile195Phe)         | I195F                | 6          | 474  | 12.85 |      |
| 33 | <i>SPOP</i>     | TUMOR SUPPRESSOR | OTHER                  | chr17 | 47696642  | 47696642  | G  | T     | exonic   | nonsynonymous_SNV    | c.3066C>A           | p.(Phe102Leu)         | F102L                | 6          | 82   | 12.9  |      |
| 33 | <i>THSD7B</i>   | TUMOR SUPPRESSOR | OTHER                  | chr2  | 137988664 | 137988664 | C  | A     | exonic   | stopgain             | c.1701C>A           | p.(Cys567Ter)         | C567X                | 7          | 237  | 9.28  |      |
| 33 | <i>PIK3CA</i>   | ONCOGENE         | PI3K                   | chr3  | 178916946 | 178916946 | G  | C     | exonic   | nonsynonymous_SNV    | c.333G>C            | p.(Lys111Asn)         | K111N                | 2          | 19   | 63.16 |      |
| 33 | <i>KRAS</i>     | ONCOGENE         | RTK/RAS                | chr12 | 25398284  | 25398284  | C  | A     | exonic   | nonsynonymous_SNV    | c.35G>T             | p.(Gly12Val)          | G12V                 | 2          | 62   | 19.35 |      |
| 33 | <i>TERT</i>     | ONCOGENE         | SENESCENCE             | chr5  | 1295228   | 1295228   | G  | A     | upstream | NA                   | NA                  | NA                    | NA                   | 1          | 586  | 2.39  |      |
| 34 | <i>FAT1</i>     | TUMOR SUPPRESSOR | DIFFERENCIATION CELL   | chr4  | 18754210  | 18754210  | G  | C     | exonic   | stopgain             | c.5330C>G           | p.(Ser1777Ter)        | S1777X               | 10         | 234  | 29.91 |      |
| 34 | <i>TP53</i>     | TUMOR SUPPRESSOR | GENOME INTEGRITY       | chr17 | 7571108   | 7571108   | C  | A     | exonic   | nonsynonymous_SNV    | c.830G>T            | p.(Cys277Phe)         | C277F                | 8          | 157  | 36.54 |      |
| 34 | <i>TERT</i>     | ONCOGENE         | SENESCENCE             | chr5  | 1295228   | 1295228   | G  | A     | upstream | NA                   | NA                  | NA                    | NA                   | 1          | 308  | 40.26 |      |
| 35 | <i>KMT2D</i>    | TUMOR SUPPRESSOR | EPIGENETIC             | chr12 | 49434618  | 49434618  | G  | C     | exonic   | stopgain             | c.6935C>G           | p.(Ser2312Ter)        | S2312X               | 31         | 3185 | 10.68 |      |
| 35 | <i>SMARCA4</i>  | TUMOR SUPPRESSOR | EPIGENETIC             | chr19 | 11150225  | 11150225  | C  | G     | exonic   | stopgain             | c.4262C>G           | p.(Ser1421Ter)        | S1421X               | 30         | 1022 | 15.26 |      |
| 35 | <i>TP53</i>     | TUMOR SUPPRESSOR | GENOME INTEGRITY       | chr17 | 7579345   | 7579352   | G  | G     | exonic   | frameshift deletion  | c.335_342del        | p.(Gly112AlafsTer34)  | G112AfsX34           | 4          | 966  | 11.08 |      |
| 36 | <i>FAT2</i>     | TUMOR SUPPRESSOR | DIFFERENCIATION CELL   | chr5  | 150934236 | 150934236 | T  | A     | splicing | NA                   | p.?                 | p.?                   | ?                    | 4          | 241  | 67.63 |      |
| 36 | <i>TP53</i>     | TUMOR SUPPRESSOR | GENOME INTEGRITY       | chr17 | 7576928   | 7576928   | T  | C     | splicing | NA                   | c.920-2A>G          | p.?                   | ?                    | 9          | 414  | 70.29 |      |
| 37 | <i>TP53</i>     | TUMOR SUPPRESSOR | GENOME INTEGRITY       | chr17 | 7571105   | 7571105   | T  | C     | exonic   | nonsynonymous_SNV    | c.833C>G            | p.(Pro278Arg)         | P278R                | 8          | 1287 | 19.97 |      |
| 37 | <i>ZFH3X</i>    | TUMOR SUPPRESSOR | SCRIPTION FACTOR-REGUL | chr16 | 72821988  | NA        | T  | <DEL> | exonic   | frameshift deletion  | c.10166_10187del    | p.Q3389fs             | Q3389fs              | NA         | 2766 | 22    |      |
| 38 | <i>KMT2D</i>    | TUMOR SUPPRESSOR | EPIGENETIC             | chr12 | 49438044  | 49438045  | T  | G     | exonic   | frameshift deletion  | c.5126_5127del      | p.(Arg1709HisfsTer25) | R1709HisX25          | 21         | 3034 | 9.62  |      |
| 38 | <i>TP53</i>     | TUMOR SUPPRESSOR | GENOME INTEGRITY       | chr17 | 7578526   | 7578526   | C  | A     | exonic   | nonsynonymous_SNV    | c.404G>T            | p.(Cys135Phe)         | C135F                | 5          | 1360 | 39.56 |      |
| 38 | <i>ZFH3X</i>    | TUMOR SUPPRESSOR | SCRIPTION FACTOR-REGUL | chr16 | 72822548  | NA        | T  | <DEL> | exonic   | frameshift deletion  | c.9612_9627del      | p.Q3204fs             | Q3204fs              | NA         | 1531 | 24    |      |
| 38 | <i>TERT</i>     | ONCOGENE         | SENESCENCE             | chr5  | 1295228   | 1295228   | G  | A     | upstream | NA                   | NA                  | NA                    | NA                   | 1          | 385  | 15.58 |      |
| 39 | <i>SMARCC1</i>  | TUMOR SUPPRESSOR | EPIGENETIC             | chr3  | 47730885  | 47730885  | C  | A     | exonic   | stopgain             | c.1255G>T           | p.(Gly419Ter)         | G419X                | 13         | 282  | 5.67  |      |
| 39 | <i>TP53</i>     | TUMOR SUPPRESSOR | GENOME INTEGRITY       | chr17 | 7573010   | 7573010   | T  | A     | splicing | NA                   | c.1101-2A>T         | p.?                   | ?                    | 11         | 2135 | 6.18  |      |
| 39 | <i>TP53</i>     | TUMOR SUPPRESSOR | GENOME INTEGRITY       | chr17 | 7578406   | 7578406   | G  | T     | exonic   | nonsynonymous_SNV    | c.524G>A            | p.(Arg175His)         | R175H                | 5          | 4325 | 6.98  |      |
| 39 | <i>TERT</i>     | ONCOGENE         | SENESCENCE             | chr5  | 1295228   | 1295228   | G  | A     | upstream | NA                   | NA                  | NA                    | NA                   | 1          | 213  | 6.57  |      |
| 40 | <i>RAD50</i>    | TUMOR SUPPRESSOR | DNA REPAIR             | chr5  | 131977928 | 131977928 | G  | T     | exonic   | stopgain             | c.3811G>T           | p.(Glu1271Ter)        | E1271X               | 25         | 240  | 5     |      |
| 40 | <i>KMT2D</i>    | TUMOR SUPPRESSOR | EPIGENETIC             | chr12 | 49443873  | 49443874  | C  | CA    | exonic   | frameshift insertion | c.3497dup           | p.(Met1166IlefsTer18) | M1166IlefsX18        | 11         | 3044 | 34.3  |      |
| 40 | <i>NSD1</i>     | BOTH             | EPIGENETIC             | chr5  | 176638690 | 176638690 | T  | A     | exonic   | stopgain             | c.3290T>A           | p.(Leu1097Ter)        | L1097X               | 5          | 2648 | 50.57 |      |
| 40 | <i>TP53</i>     | TUMOR SUPPRESSOR | GENOME INTEGRITY       | chr17 | 7577082   | 7577082   | C  | T     | exonic   | nonsynonymous_SNV    | c.856G>A            | p.(Glu286Lys)         | E286K                | 8          | 2166 | 59.51 |      |
| 40 | <i>RASA1</i>    | TUMOR SUPPRESSOR | RTK/RAS                | chr5  | 86672209  | 86672209  | G  | T     | splicing | NA                   | p.?                 | p.?                   | ?                    | 16         | 200  | 5     |      |
| 41 | <i>CDKN2A</i>   | TUMOR SUPPRESSOR | CELL CYCLE             | chr9  | 21974782  | 21974782  | C  | T     | exonic   | stopgain             | c.45G>A             | p.(Trp15Ter)          | W15X                 | 1          | 4121 | 15    |      |
| 41 | <i>NFE2L2</i>   | ONCOGENE         | OXYDATIVE STRESS       | chr2  | 178098806 | 178098806 | G  | A     | exonic   | nonsynonymous_SNV    | c.239C>T            | p.(Thr80Ile)          | T80I                 | 2          | 134  | 5.97  |      |
| 41 | <i>NFE2L2</i>   | ONCOGENE         | OXYDATIVE STRESS       | chr2  | 178098944 | 178098944 | T  | A     | exonic   | nonsynonymous_SNV    | c.101G>T            | p.(Arg34Leu)          | R34L                 | 2          | 148  | 8.11  |      |
| 41 | <i>GNANQ</i>    | ONCOGENE         | OTHER                  | chr9  | 80409488  | 80409488  | G  | A     | exonic   | nonsynonymous_SNV    | c.626A>T            | p.(Gln209Leu)         | Q209L                | 5          | 92   | 8.7   |      |
| 41 | <i>PIK3CA</i>   | ONCOGENE         | PI3K                   | chr3  | 178918300 | 178918300 | G  | G     | exonic   | nonsynonymous_SNV    | c.312G>T            | p.(Gly106Val)         | G106V                | 2          | 95   | 8.42  |      |
| 41 | <i>TERT</i>     | ONCOGENE         | SENESCENCE             | chr5  | 1295250   | 1295250   | G  | A     | upstream | NA                   | NA                  | NA                    | NA                   | 1          | 521  | 1.34  |      |
| 42 | <i>FBXW7</i>    | BOTH             | DEVELOPMENT            | chr4  | 153244092 | 153244092 | G  | A     | exonic   | nonsynonymous_SNV    | c.1825C>T           | p.(Arg609Trp)         | R609W                | 11         | 1545 | 22.27 |      |
| 42 | <i>TP53</i>     | TUMOR SUPPRESSOR | GENOME INTEGRITY       | chr17 | 7578263   | 7578263   | G  | A     | exonic   | stopgain             | c.586C>T            | p.(Arg196Ter)         | R196X                | 6          | 3626 | 41.92 |      |
| 42 | <i>AJUBA</i>    | TUMOR SUPPRESSOR | OTHER                  | chr14 | 23450522  | NA        | T  | <DEL> | exonic   | frameshift deletion  | c.908_954del        | p.G303fs              | G303fs               | NA         | 4266 | 23    |      |
| 43 | <i>BCL7C</i>    | TUMOR SUPPRESSOR | APOPTOSIS              | chr16 | 30903934  | 30903934  | G  | A     | exonic   | stopgain             | c.415C>T            | p.(Gln139Ter)         | Q139X                | 4          | 969  | 14.96 |      |
| 43 | <i>TP53</i>     | TUMOR SUPPRESSOR | GENOME INTEGRITY       | chr17 | 7578524   | 7578524   | G  | A     | exonic   | stopgain             | c.406C>T            | p.(Gln136Ter)         | Q136X                | 5          | 1084 | 23.89 |      |
| 43 | <i>DICER1</i>   | TUMOR SUPPRESSOR | OTHER                  | chr14 | 95557629  | 95557629  | T  | C     | exonic   | nonsynonymous_SNV    | c.5438A>G           | p.(Glu1813Gly)        | E1813G               | 25         | 117  | 6.84  |      |
| 44 | <i>KMT2D</i>    | TUMOR SUPPRESSOR | EPIGENETIC             | chr12 | 49432297  | 49432298  | G  | CA    | exonic   | frameshift insertion | c.8941dup           | p.(Pro2948SerfsTer25) | P2948SfsX25          | 34         | 2611 | 26.5  |      |
| 44 | <i>TP53</i>     | TUMOR SUPPRESSOR | GENOME INTEGRITY       | chr17 | 7575747   | 7575747   | G  | T     | exonic   | nonsynonymous_SNV    | c.734G>A            | p.(Gly245Asp)         | G245D                | 7          | 1271 | 45.95 |      |
| 44 | <i>KEAP1</i>    | TUMOR SUPPRESSOR | OXYDATIVE STRESS       | chr19 | 10602620  | 10602620  | C  | A     | exonic   | nonsynonymous_SNV    | c.958C>T            | p.(Arg320Trp)         | R320W                | 3          | 5097 | 60.66 |      |
| 45 | <i>FAT2</i>     | TUMOR SUPPRESSOR | DIFFERENCIATION CELL   | chr5  | 150947196 | 150947197 | G  | ATG   | A        | exonic               | frameshift deletion | c.1296_1297del        | p.(Ile433GlnfsTer14) | I433GfsX14 | 1    | 312   | 5.13 |
| 45 | <i>FANCA</i>    | TUMOR SUPPRESSOR | DNA REPAIR             | chr16 | 89874748  | 89874749  | T  | G     | exonic   | frameshift deletion  | c.549_550del        | p.(Trp183Ter)         | W183X                | 6          | 226  | 5.31  |      |
| 45 | <i>TP53</i>     | TUMOR SUPPRESSOR | GENOME INTEGRITY       | chr17 | 7577568   | 7577568   | C  | A     | exonic   | nonsynonymous_SNV    | c.713G>T            | p.(Cys238Phe)         | C238F                | 7          | 892  | 16.14 |      |
| 46 | <i>CDKN2A</i>   | TUMOR SUPPRESSOR | CELL CYCLE             | chr9  | 21971120  | 21971120  | G  | A     | exonic   | stopgain             | c.238C>T            | p.(Arg80Ter)          | R80X                 | 2          | 4627 | 45.73 |      |
| 46 | <i>TP53</i>     | TUMOR SUPPRESSOR | GENOME INTEGRITY       | chr17 | 7577121   | 7577121   | G  | A     | exonic   | nonsynonymous_SNV    | c.817C>T            | p.(Arg273Cys)         | R273C                | 8          | 1353 | 14.71 |      |
| 46 | <i>TP53</i>     | TUMOR SUPPRESSOR | GENOME INTEGRITY       | chr17 | 7578406   | 7578406   | G  | T     | exonic   | nonsynonymous_SNV    | c.524G>A            | p.(Arg175His)         | R175H                | 5          | 5710 | 28.2  |      |
| 46 | <i>TERT</i>     | ONCOGENE         | SENESCENCE             | chr5  | 1295250   | 1295250   | G  | A     | upstream | NA                   | NA                  | NA                    | NA                   | 1          | 247  | 38.06 |      |
| 47 | <i>FAT1</i>     | TUMOR SUPPRESSOR | DIFFERENCIATION CELL   | chr4  | 187630258 | 187630258 | T  | A     | exonic   | stopgain             | c.724A>T            | p.(Lys242Ter)         | K242X                | 2          | 291  | 5.15  |      |
| 47 | <i>TP53</i>     | TUMOR SUPPRESSOR | GENOME INTEGRITY       | chr17 | 7577120   | 7577120   | G  | T     | exonic   | nonsynonymous_SNV    | c.818G>A            | p.(Arg273His)         | R273H                | 8          | 335  | 11.64 |      |
| 48 | <i>FANCA</i>    | TUMOR SUPPRESSOR | DNA REPAIR             | chr16 | 89851354  | 89851354  | C  | A     | exonic   | stopgain             | c.1378C>T           | p.(Arg460Ter)         | R460X                | 15         | 2019 | 15.06 |      |
| 48 | <i>EP300</i>    | TUMOR SUPPRESSOR | EPIGENETIC             | chr22 | 41566457  | 41566459  | G  | ATG   | exonic   | in-frame deletion    | c.4336_4338del      | p.(Tyr1446del)        | Y1446del             | 27         | 204  | 30.39 |      |
| 48 | <i>FUBP1</i>    | TUMOR SUPPRESSOR | OTHER                  | chr1  | 78430337  | 78430337  | T  | C     | exonic   | frameshift deletion  | c.894del            | p.(Ile299Ter)         | I299X                | 1          | 235  | 5.96  |      |
| 48 | <i>PXDNL</i>    | TUMOR SUPPRESSOR | OTHER                  | chr8  | 52321534  | 52321534  | G  | A     | exonic   | stopgain             | c.2650C>T           | p.(Arg884Ter)         | R884X                | 17         | 6859 | 22.58 |      |
| 49 | <i>ING1</i>     | TUMOR SUPPRESSOR | APOPTOSIS              | chr13 | 111365319 | 111365319 | G  | A     | splicing | NA                   | p.?                 | p.?                   | ?                    | 7          | 1587 | 24.51 |      |
| 49 | <i>FBXW7</i>    | BOTH             | DEVELOPMENT            | chr4  | 153251941 | 153251941 | G  | A     | exonic   | stopgain             | c.825C>A            | p.(Trp275Ter)         | Y275X                | 6          | 121  | 11.57 |      |
| 49 | <i>TP53</i>     | TUMOR SUPPRESSOR | GENOME INTEGRITY       | chr17 | 7575708   | 7575708   | T  | C     | exonic   | stopgain             | c.773A>G            | p.(Gly258Gly)         | E258G                | 7          | 1190 | 28.4  |      |
| 49 | <i>TERT</i>     | ONCOGENE         | SENESCENCE             | chr5  | 1295228   | 1295228   | G  | A     | upstream | NA                   | NA                  | NA                    | NA                   | 1          | 428  | 28.27 |      |
| 50 | <i>CDKN2A</i>   | TUMOR SUPPRESSOR | CELL CYCLE             | chr9  | 21971120  | 21971120  | T  | A     | exonic   | stopgain             | c.958C>T            | p.(Arg320Trp)         | R320W                | 2          | 5029 | 22.79 |      |
| 50 | <i>FAT1</i>     | TUMOR SUPPRESSOR | DIFFERENCIATION CELL   | chr4  | 187541538 | 187541539 | G  | ATG   | exonic   | frameshift insertion | c.6197_6201dup      | p.(Lys2068SerfsTer2)  | K2068SfsX2           | 10         | 595  | 12.44 |      |
| 50 | <i>FAT1</i>     | TUMOR SUPPRESSOR | DIFFERENCIATION CELL   | chr4  | 187628349 | 187628355 | G  | ATG   | exonic   | frameshift deletion  | c.2627_2633del      | p.(Val876AlafsTer16   |                      |            |      |       |      |

|    |         |                  |                        |       |           |           |                     |          |            |                        |                     |                       |             |     |       |       |
|----|---------|------------------|------------------------|-------|-----------|-----------|---------------------|----------|------------|------------------------|---------------------|-----------------------|-------------|-----|-------|-------|
| 51 | RUNX1   | TUMOR SUPPRESSOR | SCRIPTION FACTOR-REGUL | chr21 | 36164599  | NA        | .                   | <DEL>    | exonic     | nonframeshift_deletion | c.1259_1276del      | p.420_426del          | 420_426del  | NA  | 4394  | 22    |
| 52 | KMT2B   | TUMOR SUPPRESSOR | EPIGENETIC             | chr19 | 36211000  | 36211000  | G                   | T        | exonic     | stopgain               | c.751G>T            | p.(Glu251Ter)         | E251X       | 3   | 7299  | 33.68 |
| 52 | NSD1    | BOTH             | EPIGENETIC             | chr5  | 176721980 | 176721980 | G                   | A        | exonic     | frameshift_deletion    | c.7611del           | p.(Arg2537SerfsTer41) | R2537SfsX41 | 23  | 170   | 31.18 |
| 52 | PHOX2B  | TUMOR SUPPRESSOR | SCRIPTION FACTOR-REGUL | chr4  | 41748031  | 41748047  | CCGCCCGCGTCTGCTGCTG | C        | exonic     | frameshift_deletion    | c.722_738del        | p.(Ala241GlyfsTer113) | A241GfsX113 | 3   | 1248  | 14.02 |
| 53 | KMT2D   | TUMOR SUPPRESSOR | EPIGENETIC             | chr12 | 49428051  | 49428051  | C                   | T        | exonic     | stopgain               | c.10539G>A          | p.(Trp3513Ter)        | W3513X      | 38  | 3090  | 42.17 |
| 53 | TP53    | TUMOR SUPPRESSOR | GENOME INTEGRITY       | chr17 | 7579471   | 7579472   | G                   | GC       | exonic     | frameshift_insertion   | c.215_216insG       | p.(Val73ArgfsTer76)   | V73RfsX76   | 4   | 3119  | 49.98 |
| 54 | FAT1    | TUMOR SUPPRESSOR | DIFFERENTIATION CELL   | chr4  | 187525001 | 187525001 | G                   | C        | exonic     | stopgain               | c.10679C>G          | p.(Ser3560Ter)        | S3560X      | 19  | 1313  | 17.21 |
| 54 | FAT2    | TUMOR SUPPRESSOR | DIFFERENTIATION CELL   | chr5  | 150924174 | 150924174 | G                   | A        | exonic     | stopgain               | c.6514C>T           | p.(Gln2172Ter)        | Q2172X      | 9   | 789   | 16.6  |
| 54 | FAT2    | TUMOR SUPPRESSOR | DIFFERENTIATION CELL   | chr5  | 150925730 | 150925730 | G                   | C        | exonic     | stopgain               | c.4958C>G           | p.(Ser1653Ter)        | S1653X      | 9   | 246   | 7.72  |
| 54 | MLH1    | TUMOR SUPPRESSOR | DNA REPAIR             | chr3  | 37059062  | 37059062  | CA                  | C        | exonic     | frameshift_deletion    | c.860del            | p.(Asn287ThrfsTer10)  | N287TfsX10  | 10  | 209   | 5.74  |
| 54 | NOTCH1  | BOTH             | DEVELOPMENT            | chr9  | 139396305 | 139396305 | G                   | A        | exonic     | stopgain               | c.5533C>T           | p.(Gln1845Ter)        | Q1845X      | 30  | 4097  | 18.31 |
| 54 | NOTCH2  | BOTH             | DEVELOPMENT            | chr1  | 120539688 | 120539688 | G                   | T        | exonic     | stopgain               | c.683C>A            | p.(Ser228Ter)         | S228X       | 4   | 1962  | 13.66 |
| 54 | CREBBP  | TUMOR SUPPRESSOR | EPIGENETIC             | chr16 | 3778807   | 3778807   | G                   | A        | exonic     | stopgain               | c.6241C>T           | p.(Gln2081Ter)        | Q2081X      | 31  | 9081  | 16.36 |
| 54 | KMT2C   | TUMOR SUPPRESSOR | EPIGENETIC             | chr7  | 151859864 | 151859864 | C                   | A        | exonic     | stopgain               | c.10798G>T          | p.(Glu3600Ter)        | E3600X      | 43  | 293   | 13.99 |
| 54 | KMT2C   | TUMOR SUPPRESSOR | EPIGENETIC             | chr7  | 151878464 | 151878464 | G                   | A        | exonic     | stopgain               | c.6481C>T           | p.(Gln2161Ter)        | Q2161X      | 36  | 1683  | 16.34 |
| 54 | EPHA2   | TUMOR SUPPRESSOR | OTHER                  | chr1  | 16461651  | 16461651  | G                   | A        | exonic     | stopgain               | c.1462G>T           | p.(Glu468Ter)         | E468X       | 7   | 2753  | 34.07 |
| 54 | TERT    | ONCOGENE         | SENESCENCE             | chr5  | 1295228   | 1295228   | G                   | A        | upstream   | NA                     | NA                  | NA                    | 1           | 392 | 19.39 |       |
| 55 | TERT    | ONCOGENE         | SENESCENCE             | chr5  | 1295228   | 1295228   | G                   | A        | upstream   | NA                     | NA                  | NA                    | 1           | 333 | 30.03 |       |
| 55 | TERT    | ONCOGENE         | SENESCENCE             | chr5  | 1295228   | 1295228   | G                   | A        | upstream   | NA                     | NA                  | NA                    | 1           | 302 | 24.5  |       |
| 56 | CDKN2A  | TUMOR SUPPRESSOR | CELL CYCLE             | chr9  | 21971108  | 21971108  | C                   | T        | exonic     | nonsynonymous_SNV      | c.250G>A            | p.(Asp84Asn)          | D84N        | 2   | 5740  | 33    |
| 56 | TP53    | TUMOR SUPPRESSOR | GENOME INTEGRITY       | chr17 | 7577120   | 7577120   | C                   | T        | exonic     | nonsynonymous_SNV      | c.818G>A            | p.(Arg273His)         | R273H       | 8   | 2301  | 16.78 |
| 56 | TERT    | ONCOGENE         | SENESCENCE             | chr5  | 1295250   | 1295250   | G                   | A        | upstream   | NA                     | NA                  | NA                    | 1           | 302 | 24.5  |       |
| 57 | CDKN2A  | TUMOR SUPPRESSOR | CELL CYCLE             | chr9  | 21974679  | 21974679  | G                   | A        | exonic     | stopgain               | c.148C>T            | p.(Gln50Ter)          | O50X        | 1   | 6501  | 31.78 |
| 57 | FUBP1   | TUMOR SUPPRESSOR | OTHER                  | chr1  | 78422327  | 78422328  | GAT                 | A        | exonic     | frameshift_deletion    | c.1697_1698del      | p.(Tyr566SerfsTer21)  | Y566SfsX21  | 1   | 218   | 6.88  |
| 57 | TERT    | ONCOGENE         | SENESCENCE             | chr5  | 1295250   | 1295250   | G                   | A        | upstream   | NA                     | NA                  | NA                    | 1           | 241 | 15.77 |       |
| 58 | CDKN2A  | TUMOR SUPPRESSOR | CELL CYCLE             | chr9  | 21971096  | 21971096  | C                   | A        | exonic     | stopgain               | c.262G>T            | p.(Glu88Ter)          | E88X        | 2   | 2555  | 8.57  |
| 58 | NOTCH1  | BOTH             | DEVELOPMENT            | chr9  | 139413070 | 139413072 | TAGA                | T        | exonic     | in-frame_deletion      | c.1070_1072del      | p.(Phe357del)         | F357del     | 6   | 1460  | 5.82  |
| 58 | TP53    | TUMOR SUPPRESSOR | GENOME INTEGRITY       | chr17 | 7579551   | 7579551   | GA                  | G        | exonic     | frameshift_deletion    | c.136del            | p.(Ser46ProfTer77)    | S46PfsX77   | 4   | 2831  | 6.75  |
| 58 | BCL11B  | TUMOR SUPPRESSOR | APOPTOSIS              | chr14 | 99640508  | 99640508  | C                   | A        | exonic     | stopgain               | c.2665G>T           | p.(Glu889Ter)         | E889X       | 4   | 848   | 52.71 |
| 58 | EPHA2   | TUMOR SUPPRESSOR | OTHER                  | chr1  | 16464561  | 16464561  | C                   | A        | exonic     | stopgain               | c.1099G>T           | p.(Glu367Ter)         | E367X       | 5   | 2524  | 20.01 |
| 59 | TP53    | TUMOR SUPPRESSOR | GENOME INTEGRITY       | chr17 | 7577547   | 7577547   | A                   | A        | exonic     | nonsynonymous_SNV      | c.734G>T            | p.(Gly245Val)         | G245V       | 7   | 753   | 16.33 |
| 59 | TERT    | ONCOGENE         | SENESCENCE             | chr5  | 1295228   | 1295228   | G                   | A        | upstream   | NA                     | NA                  | NA                    | 1           | 485 | 23.71 |       |
| 60 | TERT    | ONCOGENE         | SENESCENCE             | chr5  | 1295228   | 1295228   | G                   | A        | upstream   | NA                     | NA                  | NA                    | 1           | 636 | 22.17 |       |
| 60 | SMAD4   | TUMOR SUPPRESSOR | TGFβ                   | chr18 | 48591825  | 48591825  | G                   | A        | exonic     | nonsynonymous_SNV      | c.988G>A            | p.(Glu330Lys)         | E330K       | 9   | 28    | 28.57 |
| 61 | KMT2D   | TUMOR SUPPRESSOR | EPIGENETIC             | chr12 | 49418712  | 49418712  | AT                  | A        | exonic     | frameshift_deletion    | c.15802del          | p.(Ile5268LeufsTer7)  | I5268LfsX7  | 49  | 280   | 26.43 |
| 61 | PIK3CA  | ONCOGENE         | PI3K                   | chr3  | 178952085 | 178952085 | G                   | A        | exonic     | nonsynonymous_SNV      | c.3140A>G           | p.(Ile1047Arg)        | H1047R      | 21  | 78    | 21.79 |
| 62 | CDKN2A  | TUMOR SUPPRESSOR | CELL CYCLE             | chr9  | 21970971  | 21970971  | C                   | C        | exonic     | stopgain               | c.387C>G            | p.(Tyr129Ter)         | Y129X       | 2   | 5832  | 10.96 |
| 62 | TP53    | TUMOR SUPPRESSOR | GENOME INTEGRITY       | chr17 | 7579329   | 7579329   | T                   | A        | exonic     | stopgain               | c.358A>T            | p.(Lys120Ter)         | K120X       | 4   | 1492  | 5.5   |
| 62 | PTEN    | TUMOR SUPPRESSOR | PI3K                   | chr10 | 89624297  | 89624297  | A                   | T        | exonic     | stopgain               | c.71A>T             | p.(Asp24Val)          | D24V        | 1   | 53    | 26.42 |
| 62 | SMAD4   | TUMOR SUPPRESSOR | TGFβ                   | chr18 | 48591918  | 48591918  | C                   | T        | exonic     | nonsynonymous_SNV      | c.1081C>T           | p.(Arg361Cys)         | R361C       | 9   | 87    | 10.34 |
| 63 | CDKN2A  | TUMOR SUPPRESSOR | CELL CYCLE             | chr9  | 21971194  | 21971195  | C                   | CTCATCAT | exonic     | frameshift_insertion   | c.163_164insATGATGA | p.(Gly55AspfsTer67)   | G55DfsX67   | 2   | 3038  | 6.39  |
| 64 | KMT2C   | TUMOR SUPPRESSOR | EPIGENETIC             | chr7  | 151875096 | 151875096 | C                   | A        | splicing   | NA                     | p.?                 | ?                     | 38          | 251 | 5.18  |       |
| 65 | CASP8   | TUMOR SUPPRESSOR | APOPTOSIS              | chr2  | 202131411 | 202131411 | C                   | T        | exonic     | stopgain               | c.202C>T            | p.(Arg68Ter)          | R68X        | 3   | 671   | 33.98 |
| 65 | CDKN2A  | TUMOR SUPPRESSOR | CELL CYCLE             | chr9  | 21971029  | 21971029  | C                   | T        | exonic     | stopgain               | c.329G>A            | p.(Trp110Ter)         | W110X       | 2   | 3393  | 7.21  |
| 65 | NOTCH1  | BOTH             | DEVELOPMENT            | chr9  | 139413085 | 139413085 | G                   | A        | exonic     | nonsynonymous_SNV      | c.1057C>T           | p.(Arg353Cys)         | R353C       | 6   | 1887  | 34.92 |
| 65 | TERT    | ONCOGENE         | SENESCENCE             | chr5  | 1295250   | 1295250   | G                   | A        | upstream   | NA                     | NA                  | NA                    | 1           | 207 | 61.84 |       |
| 66 | KMT2B   | TUMOR SUPPRESSOR | EPIGENETIC             | chr19 | 36220936  | 36220936  | TC                  | T        | exonic     | frameshift_deletion    | c.4987del           | p.(His1663ThrfsTer33) | H1663TfsX33 | 23  | 2892  | 11.17 |
| 66 | TP53    | TUMOR SUPPRESSOR | GENOME INTEGRITY       | chr17 | 7577106   | 7577106   | G                   | A        | exonic     | nonsynonymous_SNV      | c.832C>T            | p.(Pro278Ser)         | P278S       | 8   | 1417  | 18.21 |
| 66 | TP53    | TUMOR SUPPRESSOR | GENOME INTEGRITY       | chr17 | 7577106   | 7577106   | G                   | A        | upstream   | NA                     | NA                  | NA                    | 1           | 262 | 2.02  |       |
| 67 | CDKN2A  | TUMOR SUPPRESSOR | CELL CYCLE             | chr9  | 21974678  | 21974678  | CA                  | T        | exonic     | stopgain               | c.150A>1G-A         | p.?                   | ?           | 1   | 324   | 19.66 |
| 67 | NSD1    | BOTH             | EPIGENETIC             | chr5  | 176662850 | 176662850 | G                   | G        | exonic     | frameshift_deletion    | c.750del            | p.(Ala251GlnfsTer10)  | A251GfsX10  | 2   | 482   | 10.37 |
| 67 | TP53    | TUMOR SUPPRESSOR | GENOME INTEGRITY       | chr17 | 7574030   | 7574030   | CG                  | C        | exonic     | frameshift_deletion    | c.997del            | p.(Arg333ValfsTer12)  | R333VfsX12  | 10  | 1181  | 18.63 |
| 67 | TERT    | ONCOGENE         | SENESCENCE             | chr5  | 1295228   | 1295228   | G                   | A        | upstream   | NA                     | NA                  | NA                    | 1           | 198 | 6.06  |       |
| 68 | TP53    | TUMOR SUPPRESSOR | GENOME INTEGRITY       | chr17 | 7579552   | 7579552   | AC                  | A        | exonic     | frameshift_deletion    | c.135del            | p.(Ser46ProfTer77)    | S46PfsX77   | 4   | 2756  | 17.6  |
| 68 | HNF1A   | TUMOR SUPPRESSOR | SCRIPTION FACTOR-REGUL | chr12 | 121426820 | 121426820 | C                   | T        | exonic     | stopgain               | c.511C>T            | p.(Arg171Ter)         | R171X       | 2   | 1045  | 8.52  |
| 68 | TERT    | ONCOGENE         | SENESCENCE             | chr5  | 1295228   | 1295228   | G                   | A        | upstream   | NA                     | NA                  | NA                    | 1           | 205 | 19.51 |       |
| 69 | TP53    | TUMOR SUPPRESSOR | GENOME INTEGRITY       | chr17 | 7578553   | 7578553   | T                   | C        | exonic     | stopgain               | c.377A>G            | p.(Tyr126Cys)         | Y126C       | 5   | 665   | 13.83 |
| 69 | TERT    | ONCOGENE         | SENESCENCE             | chr5  | 1295250   | 1295250   | G                   | A        | upstream   | NA                     | NA                  | NA                    | 1           | 146 | 18.49 |       |
| 70 | TP53    | TUMOR SUPPRESSOR | GENOME INTEGRITY       | chr17 | 7579528   | 7579528   | C                   | T        | exonic     | stopgain               | c.159G>A            | p.(Trp53Ter)          | W53X        | 4   | 3930  | 9.34  |
| 70 | TP53    | TUMOR SUPPRESSOR | GENOME INTEGRITY       | chr17 | 7578479   | 7578479   | G                   | A        | exonic     | nonsynonymous_SNV      | c.451C>T            | p.(Pro151Ser)         | P151S       | 5   | 2355  | 11.63 |
| 71 | PIK3CA  | ONCOGENE         | PI3K                   | chr3  | 178936082 | 178936082 | G                   | A        | exonic     | nonsynonymous_SNV      | c.1624G>A           | p.(Glu542Lys)         | E542K       | 10  | 51    | 15.69 |
| 72 | FAT2    | TUMOR SUPPRESSOR | DIFFERENTIATION CELL   | chr5  | 150897234 | 150897234 | G                   | A        | exonic     | stopgain               | c.11410C>T          | p.(Gln3804Ter)        | Q3804X      | 19  | 2492  | 24.39 |
| 72 | FAT2    | TUMOR SUPPRESSOR | DIFFERENTIATION CELL   | chr5  | 150947130 | 150947130 | GC                  | G        | exonic     | frameshift_deletion    | c.1363del           | p.(Ala455ProfTer26)   | A455PfsX26  | 1   | 2186  | 25.4  |
| 72 | ARID1B  | TUMOR SUPPRESSOR | EPIGENETIC             | chr6  | 157100247 | 157100256 | G                   | G        | exonic     | frameshift_deletion    | c.1184_1193del      | p.(Ala395GlyfsTer32)  | A395GfsX32  | 1   | 2353  | 20.95 |
| 72 | ARID1B  | TUMOR SUPPRESSOR | EPIGENETIC             | chr6  | 157100246 | NA        | .                   | <DEL>    | exonic     | frameshift_deletion    | c.1183_1193del      | p.A395fs              | A395fs      | NA  | 2397  | 21    |
| 72 | ASXL1   | TUMOR SUPPRESSOR | EPIGENETIC             | chr20 | 31023474  | 31023475  | G                   | GGAGA    | exonic     | frameshift_insertion   | c.2960_2963dup      | p.(Asp988GlufsTer4)   | D988EfsX4   | 12  | 1761  | 21.69 |
| 72 | KMT2B   | TUMOR SUPPRESSOR | EPIGENETIC             | chr19 | 36209098  | 36209098  | G                   | T        | exonic     | stopgain               | c.178G>T            | p.(Glu60Ter)          | E60X        | 1   | 1189  | 38.27 |
| 72 | KMT2B   | TUMOR SUPPRESSOR | EPIGENETIC             | chr19 | 36210440  | 36210440  | C                   | T        | exonic     | stopgain               | c.433C>T            | p.(Arg145Ter)         | R145X       | 2   | 2052  | 22.81 |
| 72 | KMT2D   | TUMOR SUPPRESSOR | EPIGENETIC             | chr12 | 49420213  | 49420213  | C                   | C        | exonic     | nonsynonymous_SNV      | c.15536G>A          | p.(Arg5179His)        | R5179H      | 48  | 1869  | 27.13 |
| 72 | AJUBA   | TUMOR SUPPRESSOR | OTHER                  | chr14 | 23450925  | NA        | .                   | <DEL>    | exonic     | frameshift_deletion    | c.121_551del        | p.L41fs               | L41fs       | NA  | 1963  | 25    |
| 73 | NOTCH1  | BOTH             | DEVELOPMENT            | chr9  | 139418191 | 139418191 | G                   | T        | exonic     | stopgain               | c.381C>A            | p.(Cys127Ter)         | C127X       | 3   | 2650  | 20.45 |
| 73 | KMT2D   | TUMOR SUPPRESSOR | EPIGENETIC             | chr12 | 49425839  | 49425839  | G                   | A        | exonic     | stopgain               | c.12649C>T          | p.(Gln4217Ter)        | Q4217X      | 39  | 3225  | 10.98 |
| 73 | TP53    | TUMOR SUPPRESSOR | GENOME INTEGRITY       | chr17 | 7579434   | 7579435   | GA                  | A        | exonic     | frameshift_insertion   | c.252_253insT       | p.(Pro85SerfsTer64)   | P85SfsX64   | 4   | 1562  | 10.82 |
| 73 | TP53    | TUMOR SUPPRESSOR | GENOME INTEGRITY       | chr17 | 7577121   | 7577121   | T                   | A        | exonic     | nonsynonymous_SNV      | c.817C>T            | p.(Arg273Cys)         | R273C       | 8   | 988   | 6.28  |
| 73 | ALPK2   | TUMOR SUPPRESSOR | OTHER                  | chr18 | 56278985  | 56278986  | T                   | TA       | exonic     | frameshift_insertion   | c.44dup             | p.(Leu15PhefsTer11)   | L15PfsX11   | 2   | 864   | 49.07 |
| 74 | CDKN2A  | TUMOR SUPPRESSOR | CELL CYCLE             | chr9  | 21971191  | 21971207  | G                   | G        | exonic     | frameshift_deletion    | c.151_167del        | p.(Val51ArgfsTer63)   | V51RfsX63   | 2   | 2075  | 11.04 |
| 74 | FAT1    | TUMOR SUPPRESSOR | DIFFERENTIATION CELL   | chr4  | 187629360 | 187629360 | G                   | C        | exonic     | stopgain               | c.1622C>G           | p.(Ser541Ter)         | S541X       | 2   | 2110  | 15.55 |
| 74 | TP53BP1 | TUMOR SUPPRESSOR | DNA REPAIR             | chr15 | 43762083  | 43762083  | TA                  | T        | exonic     | frameshift_deletion    | c.1347del           | p.(Ile450SerfsTer36)  | I450SfsX36  | 11  | 510   | 5.69  |
| 74 | AXIN2   | TUMOR SUPPRESSOR | DEVELOPMENT            | chr17 | 63532813  | 63532813  | G                   | A        | exonic     | stopgain               | c.1966C>T           | p.(Arg656Ter)         | R656X       | 8   | 2051  | 7.51  |
| 74 | NFE2L2  | ONCOGENE         | OXYDATIVE STRESS       | chr2  | 17909810  | 17909810  | C                   | G        | exonic     | nonsynonymous_SNV      | c.235G>C            | p.(Glu79Gln)          | E79Q        | 2   | 1390  | 7.05  |
| 75 | CDKN2A  | TUMOR SUPPRESSOR | CELL CYCLE             | chr9  | 21968243  | 21968243  | T                   | A        | splicing</ |                        |                     |                       |             |     |       |       |

|    |        |                  |                      |       |           |           |          |       |          |                      |                        |                        |                |              |      |       |    |
|----|--------|------------------|----------------------|-------|-----------|-----------|----------|-------|----------|----------------------|------------------------|------------------------|----------------|--------------|------|-------|----|
| 76 | SMAD3  | TUMOR SUPPRESSOR | TGFβ                 | chr15 | 67473669  | 67473669  | GC       | G     | exonic   | frameshift deletion  | c.750del               | p.(Ser251ArgfsTer5)    | S251RfsX5      | 6            | 1807 | 12.45 |    |
| 77 | ARID1A | TUMOR SUPPRESSOR | EPIGENETIC           | chr1  | 27057633  | NA        | .        | <DEL> | A        | exonic               | frameshift deletion    | c.1351delA             | p.I451fs       | I451fs       | NA   | 1320  | 23 |
| 77 | TP53   | TUMOR SUPPRESSOR | GENOME INTEGRITY     | chr17 | 7574003   | 7574003   | .        | A     | exonic   | stopgain             | c.1024C>T              | p.(Arg342Ter)          | R342X          | 10           | 2856 | 70.13 |    |
| 77 | PIK3CA | ONCOGENE         | PI3K                 | chr3  | 178952085 | 178952085 | A        | G     | exonic   | nonsynonymous SNV    | c.3140A>G              | p.(His1047Arg)         | H1047R         | 21           | 344  | 40.41 |    |
| 78 | KMT2D  | TUMOR SUPPRESSOR | EPIGENETIC           | chr12 | 49426007  | 49426007  | C        | A     | exonic   | stopgain             | c.12481G>T             | p.(Glu4161Ter)         | E4161X         | 39           | 4937 | 10.96 |    |
| 78 | TERT   | ONCOGENE         | SENESCENCE           | chr5  | 1295228   | 1295228   | A        | A     | upstream | NA                   | NA                     | NA                     | NA             | 1            | 333  | 2.4   |    |
| 79 | CDKN2A | TUMOR SUPPRESSOR | CELL CYCLE           | chr9  | 21971110  | 21971110  | T        | C     | exonic   | nonsynonymous SNV    | c.248A>G               | p.(His83Arg)           | H83R           | 2            | 1800 | 47    |    |
| 79 | FAT2   | TUMOR SUPPRESSOR | DIFFERENTIATION CELL | chr5  | 150897328 | 150897328 | T        | A     | splicing | NA                   | c.11318-2A>T           | p.?                    | ?              | 19           | 2664 | 65.99 |    |
| 79 | NOTCH1 | BOTH             | DEVELOPMENT          | chr9  | 139400141 | 139400141 | C        | C     | exonic   | frameshift deletion  | c.4197_4207del         | p.(Asn1399LysfsTer2)   | N1399KfsX2     | 25           | 2564 | 49.38 |    |
| 79 | NOTCH1 | BOTH             | DEVELOPMENT          | chr9  | 139400140 | NA        | .        | <DEL> | A        | exonic               | nonframeshift deletion | c.4197_4208del         | p.1399_1403del | 1399_1403del | NA   | 2615  | 49 |
| 79 | KMT2D  | TUMOR SUPPRESSOR | EPIGENETIC           | chr12 | 49443774  | 49443775  | .        | T     | exonic   | frameshift deletion  | c.3596_3597del         | p.(Leu1199HisfsTer7)   | L1199HfsX7     | 11           | 2558 | 27.56 |    |
| 79 | KMT2D  | TUMOR SUPPRESSOR | EPIGENETIC           | chr12 | 49446787  | 49446789  | .        | T     | exonic   | frameshift deletion  | c.1011_1023del         | p.(Glu338ThrfsTer60)   | E338TfsX60     | 8            | 1489 | 19.14 |    |
| 79 | TP53   | TUMOR SUPPRESSOR | GENOME INTEGRITY     | chr17 | 7578395   | 7578395   | G        | A     | exonic   | nonsynonymous SNV    | c.535C>T               | p.(His1791Yr)          | H179Y          | 5            | 2320 | 41.34 |    |
| 80 | CDKN2A | TUMOR SUPPRESSOR | CELL CYCLE           | chr9  | 21971091  | 21971092  | G        | GC    | exonic   | frameshift insertion | c.266dup               | p.(Phe90LeufsTer30)    | F90LfsX30      | 2            | 3820 | 7.7   |    |
| 80 | NOTCH1 | BOTH             | DEVELOPMENT          | chr9  | 139409769 | 139409769 | C        | A     | exonic   | stopgain             | c.1987G>T              | p.(Glu663Ter)          | E663X          | 12           | 3758 | 8.22  |    |
| 80 | TP53   | TUMOR SUPPRESSOR | GENOME INTEGRITY     | chr17 | 7577093   | 7577093   | C        | T     | exonic   | nonsynonymous SNV    | c.845G>A               | p.(Arg292Gln)          | R292Q          | 8            | 1869 | 6.58  |    |
| 80 | TP53   | TUMOR SUPPRESSOR | GENOME INTEGRITY     | chr17 | 7578406   | 7578406   | C        | T     | exonic   | nonsynonymous SNV    | c.524G>A               | p.(Arg179His)          | R179H          | 5            | 4135 | 15.91 |    |
| 80 | PIK3CA | ONCOGENE         | PI3K                 | chr3  | 178952085 | 178952085 | A        | G     | exonic   | nonsynonymous SNV    | c.3140A>G              | p.(His1047Arg)         | H1047R         | 21           | 3154 | 7.29  |    |
| 80 | TERT   | ONCOGENE         | SENESCENCE           | chr5  | 1295228   | 1295228   | A        | A     | upstream | NA                   | NA                     | NA                     | NA             | 1            | 273  | 10.62 |    |
| 81 | DNMT3A | TUMOR SUPPRESSOR | EPIGENETIC           | chr2  | 25466783  | 25466784  | CAA      | C     | exonic   | frameshift deletion  | c.1919_1920del         | p.(Phe640Ter)          | F640X          | 16           | 1274 | 6.59  |    |
| 82 | PTCH1  | TUMOR SUPPRESSOR | DEVELOPMENT          | chr9  | 98220280  | NA        | .        | <DEL> | A        | exonic               | frameshift deletion    | c.3167_3168del         | p.I1056fs      | I1056fs      | NA   | 2153  | 41 |
| 82 | TP53   | TUMOR SUPPRESSOR | GENOME INTEGRITY     | chr17 | 7577538   | 7577538   | C        | T     | exonic   | nonsynonymous SNV    | c.743G>A               | p.(Arg248Gln)          | R248Q          | 7            | 819  | 32.11 |    |
| 83 | CDKN2A | TUMOR SUPPRESSOR | CELL CYCLE           | chr9  | 21971120  | 21971120  | G        | A     | exonic   | stopgain             | c.238C>T               | p.(Arg80Ter)           | R80X           | 2            | 4373 | 38.12 |    |
| 83 | FAT1   | TUMOR SUPPRESSOR | DIFFERENTIATION CELL | chr4  | 187524700 | 187524700 | C        | T     | exonic   | stopgain             | c.10980G>A             | p.(Trp3660Ter)         | W3660X         | 19           | 3266 | 35.46 |    |
| 83 | TP53   | TUMOR SUPPRESSOR | GENOME INTEGRITY     | chr17 | 7577114   | 7577114   | C        | A     | exonic   | nonsynonymous SNV    | c.824G>T               | p.(Cys275Phe)          | C275F          | 8            | 1765 | 32.97 |    |
| 83 | PIK3CA | ONCOGENE         | PI3K                 | chr3  | 178936091 | 178936091 | G        | A     | exonic   | nonsynonymous SNV    | c.1633G>A              | p.(Glu545Lys)          | E545K          | 10           | 86   | 22.09 |    |
| 83 | TERT   | ONCOGENE         | SENESCENCE           | chr5  | 1295228   | 1295228   | A        | A     | upstream | NA                   | NA                     | NA                     | NA             | 1            | 296  | 11.49 |    |
| 83 | TGFB2  | TUMOR SUPPRESSOR | TGFβ                 | chr3  | 30648469  | 30648493  | G        | G     | exonic   | frameshift deletion  | c.94_94+24del          | p.?                    | ?              | 1            | 2326 | 7.74  |    |
| 84 | CDKN2A | TUMOR SUPPRESSOR | CELL CYCLE           | chr9  | 21971207  | 21971207  | AC       | A     | exonic   | frameshift deletion  | c.151del               | p.(Val51SerfsTer2)     | V51SfsX2       | 2            | 2750 | 7.53  |    |
| 84 | TERT   | ONCOGENE         | SENESCENCE           | chr5  | 1295250   | 1295250   | A        | A     | upstream | NA                   | NA                     | NA                     | NA             | 1            | 139  | 17.99 |    |
| 85 | FAT1   | TUMOR SUPPRESSOR | DIFFERENTIATION CELL | chr4  | 187525071 | 187525071 | C        | A     | exonic   | stopgain             | c.10609G>T             | p.(Glu537Ter)          | E537X          | 19           | 865  | 29.94 |    |
| 85 | TP53   | TUMOR SUPPRESSOR | GENOME INTEGRITY     | chr17 | 7577018   | 7577018   | C        | A     | splicing | NA                   | c.919+1G>T             | p.?                    | ?              | 8            | 1870 | 53.37 |    |
| 85 | GRIN2A | TUMOR SUPPRESSOR | OTHER                | chr16 | 10273953  | 10273953  | G        | A     | exonic   | stopgain             | c.316C>T               | p.(Gln106Ter)          | Q106X          | 3            | 1727 | 16.73 |    |
| 85 | TERT   | ONCOGENE         | SENESCENCE           | chr5  | 1295228   | 1295228   | G        | A     | upstream | NA                   | NA                     | NA                     | NA             | 1            | 212  | 34.43 |    |
| 86 | NOTCH1 | BOTH             | DEVELOPMENT          | chr9  | 139413070 | 139413072 | TAGA     | T     | exonic   | in-frame deletion    | c.1070_1072del         | p.(Phe357del)          | F357del        | 6            | 876  | 26.71 |    |
| 86 | TP53   | TUMOR SUPPRESSOR | GENOME INTEGRITY     | chr17 | 7578212   | 7578212   | G        | A     | exonic   | stopgain             | c.637C>T               | p.(Arg213Ter)          | R213X          | 6            | 581  | 45.09 |    |
| 87 | TP53   | TUMOR SUPPRESSOR | GENOME INTEGRITY     | chr17 | 7577535   | 7577535   | G        | A     | exonic   | nonsynonymous SNV    | c.746G>T               | p.(Arg249Met)          | R249M          | 7            | 936  | 35.26 |    |
| 87 | TERT   | ONCOGENE         | SENESCENCE           | chr5  | 1295228   | 1295228   | C        | A     | upstream | NA                   | NA                     | NA                     | NA             | 1            | 136  | 36.76 |    |
| 88 | CDKN2A | TUMOR SUPPRESSOR | CELL CYCLE           | chr9  | 21974782  | 21974782  | G        | T     | exonic   | stopgain             | c.45G>A                | p.(Trp15Ter)           | W15X           | 1            | 1863 | 10.9  |    |
| 88 | NOTCH1 | BOTH             | DEVELOPMENT          | chr9  | 139397771 | 139397777 | GTAGACGA | T     | exonic   | frameshift deletion  | c.5024_5030del         | p.(Ile1675ThrfsTer121) | I1675TfsX121   | 27           | 928  | 6.57  |    |
| 88 | BCL10  | TUMOR SUPPRESSOR | IMMUNITY             | chr1  | 85736385  | 85736385  | G        | A     | exonic   | stopgain             | c.262C>T               | p.(Arg88Ter)           | R88X           | 2            | 1437 | 45.86 |    |
| 89 | CDKN2A | TUMOR SUPPRESSOR | CELL CYCLE           | chr9  | 21974684  | 21974684  | G        | A     | exonic   | stopgain             | c.143C>T               | p.(Pro48Leu)           | P48L           | 1            | 3519 | 41.94 |    |
| 89 | FAT2   | TUMOR SUPPRESSOR | DIFFERENTIATION CELL | chr5  | 150923868 | 150923868 | TG       | T     | exonic   | frameshift deletion  | c.6820del              | p.(Gln2274AsnfsTer18)  | Q2274NfsX18    | 9            | 2229 | 25.3  |    |
| 89 | FAT4   | TUMOR SUPPRESSOR | DIFFERENTIATION CELL | chr4  | 126336204 | 126336204 | TC       | T     | exonic   | frameshift deletion  | c.6087del              | p.(Arg2030AspfsTer15)  | R2030DfsX15    | 11           | 289  | 5.19  |    |
| 89 | NOTCH1 | BOTH             | DEVELOPMENT          | chr9  | 139411737 | 139411737 | C        | T     | exonic   | stopgain             | c.1542C>A              | p.(Cys514Ter)          | C514X          | 9            | 2196 | 59.11 |    |
| 89 | TP53   | TUMOR SUPPRESSOR | GENOME INTEGRITY     | chr17 | 7578392   | 7578392   | C        | A     | exonic   | stopgain             | c.538G>T               | p.(Glu180Ter)          | E180X          | 5            | 4289 | 24.57 |    |
| 89 | PIK3CA | ONCOGENE         | PI3K                 | chr3  | 178948100 | 178948100 | T        | A     | exonic   | nonsynonymous SNV    | c.2872C>A              | p.(Gln958Lys)          | Q958L          | 20           | 86   | 10.47 |    |
| 89 | HRAS   | ONCOGENE         | RTK/RAS              | chr11 | 533874    | 533874    | C        | A     | exonic   | nonsynonymous SNV    | c.182A>T               | p.(Gln61Leu)           | Q61L           | 3            | 4835 | 28.2  |    |
| 89 | TERT   | ONCOGENE         | SENESCENCE           | chr5  | 1295250   | 1295250   | G        | A     | upstream | NA                   | NA                     | NA                     | NA             | 1            | 209  | 48.92 |    |
| 90 | TP53   | TUMOR SUPPRESSOR | GENOME INTEGRITY     | chr17 | 7579377   | 7579377   | G        | A     | exonic   | stopgain             | c.310C>T               | p.(Gln104Ter)          | Q104X          | 4            | 2076 | 9.77  |    |
| 90 | TP53   | TUMOR SUPPRESSOR | GENOME INTEGRITY     | chr17 | 7577121   | 7577121   | G        | A     | exonic   | nonsynonymous SNV    | c.817C>T               | p.(Arg273Cys)          | R273C          | 8            | 1689 | 9.77  |    |
| 90 | PIK3CA | ONCOGENE         | PI3K                 | chr3  | 178936074 | 178936074 | G        | G     | exonic   | nonsynonymous SNV    | c.1618C>G              | p.(Pro539Arg)          | P539R          | 10           | 56   | 12.5  |    |
| 90 | TERT   | ONCOGENE         | SENESCENCE           | chr5  | 1295228   | 1295228   | C        | A     | upstream | NA                   | NA                     | NA                     | NA             | 1            | 252  | 11.51 |    |
| 91 | MUTYH  | TUMOR SUPPRESSOR | DNA REPAIR           | chr1  | 45798768  | 45798768  | A        | A     | splicing | NA                   | c.453+1G>T             | p.?                    | ?              | 5            | 207  | 6.76  |    |
| 91 | KMT2B  | TUMOR SUPPRESSOR | EPIGENETIC           | chr19 | 36211288  | 36211289  | TGG      | T     | exonic   | frameshift deletion  | c.1039_1040del         | p.(Gly347ThrfsTer16)   | G347TfsX16     | 3            | 202  | 6.93  |    |
| 91 | TERT   | ONCOGENE         | SENESCENCE           | chr5  | 1295228   | 1295228   | A        | A     | upstream | NA                   | NA                     | NA                     | NA             | 1            | 384  | 27.34 |    |
| 92 | RAD51C | TUMOR SUPPRESSOR | DNA REPAIR           | chr17 | 56787296  | 56787296  | T        | A     | exonic   | stopgain             | c.782T>A               | p.(Leu261Ter)          | L261X          | 5            | 236  | 5.93  |    |
| 92 | NOTCH1 | BOTH             | DEVELOPMENT          | chr9  | 139401378 | 139401384 | GGGTCAAC | G     | exonic   | frameshift deletion  | c.3685_3691del         | p.(Val1229ProfsTer14)  | V1229PfsX14    | 23           | 1939 | 28.88 |    |
| 92 | TP53   | TUMOR SUPPRESSOR | GENOME INTEGRITY     | chr17 | 7574003   | 7574003   | CG       | C     | exonic   | frameshift deletion  | c.1024del              | p.(Arg342GlufsTer3)    | R342EfsX3      | 10           | 1926 | 19.78 |    |
| 93 | CDKN2A | TUMOR SUPPRESSOR | CELL CYCLE           | chr9  | 21971096  | 21971096  | C        | A     | exonic   | stopgain             | c.262G>T               | p.(Glu88Ter)           | E88X           | 2            | 5480 | 16.15 |    |
| 93 | FAT2   | TUMOR SUPPRESSOR | DIFFERENTIATION CELL | chr5  | 150922822 | 150922822 | C        | T     | exonic   | stopgain             | c.7866C>A              | p.(Tyr2622Ter)         | Y2622X         | 9            | 256  | 8.2   |    |
| 93 | BRCA1  | TUMOR SUPPRESSOR | DNA REPAIR           | chr17 | 41245513  | 41245516  | TTGGC    | T     | exonic   | frameshift deletion  | c.2032_2035del         | p.(Ala678ArgfsTer22)   | A678RfsX22     | 10           | 215  | 6.05  |    |
| 93 | CDK12  | TUMOR SUPPRESSOR | DNA REPAIR           | chr17 | 37618447  | 37618447  | AG       | A     | exonic   | frameshift deletion  | c.123del               | p.(Lys41AsnfsTer16)    | K41NfsX16      | 1            | 255  | 7.06  |    |
| 93 | POLE   | TUMOR SUPPRESSOR | DNA REPAIR           | chr12 | 133253184 | 133253184 | G        | A     | exonic   | nonsynonymous SNV    | c.857C>T               | p.(Pro286Leu)          | P286L          | 9            | 155  | 7.74  |    |
| 93 | FBXW7  | BOTH             | DEVELOPMENT          | chr4  | 153247169 | 153247169 | A        | G     | exonic   | nonsynonymous SNV    | c.1393T>C              | p.(Tyr465His)          | Y465H          | 9            | 43   | 30.23 |    |
| 93 | NOTCH2 | BOTH             | DEVELOPMENT          | chr1  | 120512233 | 120512234 | TCA      | T     | exonic   | frameshift deletion  | c.1008_1009del         | p.(Ser336ArgfsTer4)    | S336RfsX4      | 6            | 228  | 5.26  |    |
| 93 | TCF7L2 | TUMOR SUPPRESSOR | DEVELOPMENT          | chr10 | 114710600 | 114710601 | GGA      | G     | exonic   | frameshift deletion  | c.87_88del             | p.(Lys30GlufsTer13)    | K30EfsX13      | 1            | 239  | 5.44  |    |
| 93 | ARID1B | TUMOR SUPPRESSOR | EPIGENETIC           | chr6  | 157522589 | 157522589 | GA       | G     | exonic   | frameshift deletion  | c.4824del              | p.(Lys1608AsnfsTer19)  | K1608NfsX19    | 17           | 202  | 6.44  |    |
| 93 | ASXL2  | TUMOR SUPPRESSOR | EPIGENETIC           | chr2  | 25965700  | 25965701  | TGC      | T     | exonic   | frameshift deletion  | c.3505_3506del         | p.(Ala1169AsnfsTer5)   | A1169NfsX5     | 12           | 234  | 5.13  |    |
| 93 | BRD9   | TUMOR SUPPRESSOR | EPIGENETIC           | chr5  | 891793    | 891793    | C        | A     | exonic   | stopgain             | c.229G>T               | p.(Glu77Ter)           | E77X           | 2            | 265  | 6.04  |    |
| 93 | KANSL1 | TUMOR SUPPRESSOR | EPIGENETIC           | chr17 | 44117182  | 44117182  | AT       | A     | exonic   | frameshift deletion  | c.2089del              | p.(Ile697SerfsTer35)   | I697SfsX35     | 8            | 212  | 5.66  |    |
| 93 | KMT2C  | TUMOR SUPPRESSOR | EPIGENETIC           | chr7  | 151860801 | 151860802 | GCT      | G     | exonic   | frameshift deletion  | c.9860_9861del         | p.(Gln3287ProfsTer38)  | Q3287PfsX38    | 43           | 219  | 5.94  |    |
| 93 | KMT2C  | TUMOR SUPPRESSOR | EPIGENETIC           | chr7  | 151877196 | 151877196 | C        | A     | exonic   | stopgain             | c.7165G>T              | p.(Glu2389Ter)         | E2389X         | 37           | 217  | 9.22  |    |
| 93 | SETD2  | TUMOR SUPPRESSOR | EPIGENETIC           | chr3  | 47125539  | 47125539  | G        | A     | exonic   | stopgain             | c.5731C>T              | p.(Gln1911Ter)         | Q1911X         | 12           | 239  | 5.86  |    |
| 93 | SETD2  | TUMOR SUPPRESSOR | EPIGENETIC           | chr3  | 47125564  | 47125564  | TG       | T     | exonic   | frameshift deletion  | c.5705del              | p.(Lys1903ArgfsTer10)  | K1903RfsX10    | 12           | 269  | 7.06  |    |
| 93 | TP53   | TUMOR SUPPRESSOR | GENOME INTEGRITY     | chr17 | 7577099   | 7577099   | G        | G     | exonic   | nonsynonymous SNV    | c.839G>C               | p.(Arg280Thr)          | R280T          | 8            | 128  | 43.75 |    |
| 93 | CHD6   | TUMOR SUPPRESSOR | OTHER                | chr20 | 40162006  | 40162010  | TATGGG   | T     | exonic   | frameshift deletion  | c.233_237del           | p.(Ser78Ter)           | S78X           | 3            | 223  | 6.28  |    |
| 93 | SDHA   | TUMOR SUPPRESSOR | OTHER                | chr5  | 251157    | 251163    | AAGTTTGT | T     | exonic   | frameshift deletion  | c.1602_1608del         | p.(Cys536LysfsTer9)    | C536KfsX9      | 12           | 287  | 7.32  |    |
| 93 | SLX4   | TUMOR SUPPRESSOR | DNA REPAIR           | chr16 | 3941136   | 3941137   | TTC      | T     | exonic   | frameshift deletion  | c.2502_2503del         | p.(Lys835IlefsTer13)   | K835IfsX13     | 12           | 208  | 5.77  |    |
| 93 | SLX4   | TUMOR SUPPRESSOR | DNA REPAIR           | chr16 | 3958744   | 3958745   | CC       | CA    | exonic   | frameshift insertion |                        |                        |                |              |      |       |    |

|     |         |                  |                      |       |           |           |               |     |                |                         |                                 |                        |                     |           |      |       |       |
|-----|---------|------------------|----------------------|-------|-----------|-----------|---------------|-----|----------------|-------------------------|---------------------------------|------------------------|---------------------|-----------|------|-------|-------|
| 94  | CDKN2A  | TUMOR SUPPRESSOR | CELL CYCLE           | chr9  | 21971186  | 21971186  | G             | A   | exonic         | stopgain                | c.172C>T                        | p.(Arg58Ter)           | R58X                | 2         | 2278 | 55.14 |       |
| 94  | ASXL1   | TUMOR SUPPRESSOR | EPIGENETIC           | chr20 | 31022440  | 31022441  | GGA           | G   | exonic         | frameshift_deletion     | c.1926_1927del                  | p.(Gly645TrpfsTer12)   | G645WfsX12          | 12        | 1518 | 5.93  |       |
| 94  | ASXL1   | TUMOR SUPPRESSOR | EPIGENETIC           | chr20 | 31022441  | 31022441  | GA            | G   | exonic         | frameshift_deletion     | c.1926del                       | p.(Gly645ValfsTer58)   | G645VfsX58          | 12        | 1517 | 37.44 |       |
| 94  | SMARCB1 | TUMOR SUPPRESSOR | EPIGENETIC           | chr22 | 24176339  | 24176339  | G             | A   | exonic         | nonsynonymous_SNV       | c.1130G>A                       | p.(Arg377His)          | R377H               | 9         | 3768 | 30.18 |       |
| 94  | PIK3CA  | ONCOGENE         | PI3K                 | chr3  | 178936091 | 178936091 | G             | A   | exonic         | nonsynonymous_SNV       | c.1633G>A                       | p.(Glu545Lys)          | E545K               | 10        | 66   | 48.48 |       |
| 94  | TERT    | ONCOGENE         | SENESCENCE           | chr5  | 1295250   | 1295250   | G             | A   | upstream       | NA                      | NA                              | NA                     | NA                  | 1         | 305  | 47.54 |       |
| 95  | FBXW7   | BOTH             | DEVELOPMENT          | chr4  | 153247294 | 153247294 | G             | C   | exonic         | nonsynonymous_SNV       | c.1268C>G                       | p.(Ala423Gly)          | A423G               | 9         | 164  | 6.1   |       |
| 95  | TP53    | TUMOR SUPPRESSOR | GENOME INTEGRITY     | chr17 | 7578532   | 7578532   | A             | T   | exonic         | nonsynonymous_SNV       | c.398T>A                        | p.(Met133Lys)          | M133K               | 5         | 1690 | 9.59  |       |
| 95  | CIITA   | TUMOR SUPPRESSOR | IMMUNITY             | chr16 | 11001085  | 11001085  | AT            | A   | exonic         | frameshift_deletion     | c.1736del                       | p.(Met579SerfsTer9)    | M579SfsX9           | 11        | 8366 | 8.51  |       |
| 95  | NFE2L2  | ONCOGENE         | OXYDATIVE STRESS     | chr2  | 178098809 | 178098809 | T             | A   | exonic         | nonsynonymous_SNV       | c.236A>T                        | p.(Glu79Val)           | E79V                | 2         | 145  | 10.34 |       |
| 96  | FAT1    | TUMOR SUPPRESSOR | DIFFERENTIATION CELL | chr4  | 187532849 | 187532849 | G             | A   | exonic         | stopgain                | c.9544C>T                       | p.(Gln3182Ter)         | Q3182X              | 14        | 1550 | 12.32 |       |
| 96  | FAT1    | TUMOR SUPPRESSOR | DIFFERENTIATION CELL | chr4  | 187629264 | 187629264 | AT            | A   | exonic         | frameshift_deletion     | c.1718del                       | p.(Asn573IlefsTer10)   | N573IfsX10          | 2         | 2056 | 12.35 |       |
| 96  | NOTCH1  | BOTH             | DEVELOPMENT          | chr9  | 139397730 | 139397730 | G             | A   | exonic         | stopgain                | c.5071C>T                       | p.(Gln1691Ter)         | Q1691X              | 27        | 1336 | 14.15 |       |
| 96  | TP53    | TUMOR SUPPRESSOR | GENOME INTEGRITY     | chr17 | 7578453   | 7578453   | TG            | T   | exonic         | frameshift_deletion     | c.477del                        | p.(Met160TrpfsTer10)   | M160WfsX10          | 5         | 1931 | 14.71 |       |
| 96  | HRAS    | ONCOGENE         | RTK/RAS              | chr11 | 534288    | 534288    | G             | T   | exonic         | nonsynonymous_SNV       | c.35G>A                         | p.(Gly12Asp)           | G12D                | 2         | 5857 | 28.21 |       |
| 96  | TERT    | ONCOGENE         | SENESCENCE           | chr5  | 1295228   | 1295228   | G             | A   | upstream       | NA                      | NA                              | NA                     | NA                  | 1         | 191  | 15.71 |       |
| 97  | TP53    | TUMOR SUPPRESSOR | GENOME INTEGRITY     | chr17 | 7579321   | 7579322   | TGA           | T   | exonic         | splice                  | c.365_366del                    | p.(Val112AspfsTer26)   | V112DfsX26          | 4         | 72   | 35.27 |       |
| 97  | PIK3CA  | ONCOGENE         | PI3K                 | chr3  | 178936091 | 178936091 | G             | A   | exonic         | nonsynonymous_SNV       | c.1833G>A                       | p.(Glu545Lys)          | E545K               | 10        | 72   | 25    |       |
| 98  | FAT1    | TUMOR SUPPRESSOR | DIFFERENTIATION CELL | chr4  | 187549439 | 187549439 | CG            | C   | exonic         | frameshift_deletion     | c.4679del                       | p.(Pro1560ArgfsTer25)  | P1560RfsX25         | 9         | 1223 | 14.55 |       |
| 98  | NOTCH1  | BOTH             | DEVELOPMENT          | chr9  | 139412675 | 139412675 | T             | C   | exonic         | nonsynonymous_SNV       | c.1169A>G                       | p.(Asn390Ser)          | N390S               | 7         | 1747 | 23.35 |       |
| 98  | TP53    | TUMOR SUPPRESSOR | GENOME INTEGRITY     | chr17 | 7577568   | 7577569   | C             | A   | CAACTGCAGTT    | exonic                  | frameshift_insertion            | c.712_713nsAACTGCAGTT  | p.(Cys238Ter)       | C238X     | 7    | 1364  | 8.28  |
| 98  | TP53    | TUMOR SUPPRESSOR | GENOME INTEGRITY     | chr17 | 7577571   | 7577572   | G             | AAC | exonic         | frameshift_insertion    | c.709_710insGT                  | p.(Met237SerfsTer11)   | M237SfsX11          | 7         | 1280 | 8.75  |       |
| 98  | TP53    | TUMOR SUPPRESSOR | GENOME INTEGRITY     | chr17 | 7577082   | 7577082   | G             | T   | exonic         | nonsynonymous_SNV       | c.856G>A                        | p.(Glu286Lys)          | E286K               | 8         | 1720 | 17.73 |       |
| 98  | PDGFRA  | ONCOGENE         | RTK/RAS              | chr4  | 55131161  | 55131161  | G             | A   | exonic         | nonsynonymous_SNV       | c.704G>A                        | p.(Cys235Tyr)          | C235Y               | 5         | 113  | 9.73  |       |
| 98  | TERT    | ONCOGENE         | SENESCENCE           | chr5  | 1295228   | 1295228   | G             | A   | upstream       | NA                      | NA                              | NA                     | NA                  | 1         | 265  | 29.81 |       |
| 99  | NOTCH3  | BOTH             | DEVELOPMENT          | chr19 | 15288598  | 15288631  | G             | A   | exonic         | frameshift_deletion     | c.4108_4114del                  | p.(Pro1370SerfsTer39)  | P1370SfsX39         | 24        | 1763 | 22.52 |       |
| 99  | TP53    | TUMOR SUPPRESSOR | GENOME INTEGRITY     | chr17 | 7577569   | 7577569   | G             | T   | exonic         | nonsynonymous_SNV       | c.712T>A                        | p.(Cys238Ser)          | C238S               | 7         | 1318 | 79.67 |       |
| 100 | CDKN2A  | TUMOR SUPPRESSOR | CELL CYCLE           | chr9  | 21971016  | 21971016  | CG            | C   | exonic         | frameshift_deletion     | c.342del                        | p.(Val115TrpfsTer31)   | V115WfsX31          | 2         | 1862 | 19.55 |       |
| 100 | CDKN2A  | TUMOR SUPPRESSOR | CELL CYCLE           | chr9  | 21971036  | 21971037  | TGC           | T   | exonic         | frameshift_deletion     | c.321_322del                    | p.(Asp108CysfsTer11)   | D108CfsX11          | 2         | 1993 | 19.67 |       |
| 100 | CDKN2A  | TUMOR SUPPRESSOR | CELL CYCLE           | chr9  | 21971153  | 21971153  | C             | A   | exonic         | stopgain                | c.205G>T                        | p.(Glu69Ter)           | E69X                | 2         | 1419 | 43.55 |       |
| 100 | FANCC   | TUMOR SUPPRESSOR | DNA REPAIR           | chr9  | 97864110  | 97864111  | G             | GT  | exonic         | frameshift_insertion    | c.1555dup                       | p.(Thr519AsnfsTer9)    | T519NfsX9           | 15        | 1566 | 55.75 |       |
| 100 | NOTCH1  | BOTH             | DEVELOPMENT          | chr9  | 139410473 | 139410473 | G             | T   | exonic         | stopgain                | c.1629C>A                       | p.(Cys543Ter)          | C543X               | 10        | 971  | 45.83 |       |
| 100 | TP53    | TUMOR SUPPRESSOR | GENOME INTEGRITY     | chr17 | 7577114   | 7577114   | C             | A   | exonic         | nonsynonymous_SNV       | c.824G>T                        | p.(Cys275Phe)          | C275F               | 8         | 981  | 75.54 |       |
| 100 | NFE2L2  | ONCOGENE         | OXYDATIVE STRESS     | chr2  | 178098957 | 178098957 | G             | A   | exonic         | nonsynonymous_SNV       | c.88C>T                         | p.(Leu30Phe)           | L30F                | 2         | 4579 | 33.96 |       |
| 100 | THSD7B  | TUMOR SUPPRESSOR | OTHER                | chr2  | 138414418 | 138414418 | C             | A   | exonic         | stopgain                | c.4071C>A                       | p.(Cys135Ter)          | C135X               | 22        | 661  | 23.6  |       |
| 100 | TERT    | ONCOGENE         | SENESCENCE           | chr5  | 1295228   | 1295228   | G             | A   | upstream       | NA                      | NA                              | NA                     | NA                  | 1         | 161  | 22.36 |       |
| 101 | FAT1    | TUMOR SUPPRESSOR | DIFFERENTIATION CELL | chr4  | 187524131 | 187524132 | G             | GA  | exonic         | frameshift_insertion    | c.11407dup                      | p.(Ser3803PhefsTer6)   | S3803PfsX6          | 20        | 1139 | 19.67 |       |
| 101 | TP53    | TUMOR SUPPRESSOR | GENOME INTEGRITY     | chr17 | 7577121   | 7577121   | G             | A   | exonic         | nonsynonymous_SNV       | c.817C>T                        | R727C                  | 8                   | 1490      | 9.53 |       |       |
| 101 | PTEN    | TUMOR SUPPRESSOR | PI3K                 | chr10 | 89624274  | 89624274  | T             | A   | exonic         | stopgain                | c.48T>A                         | p.(Tyr16Ter)           | Y16X                | 1         | 1032 | 20.35 |       |
| 101 | TERT    | ONCOGENE         | SENESCENCE           | chr5  | 1295228   | 1295228   | G             | A   | upstream       | NA                      | NA                              | NA                     | NA                  | 1         | 234  | 13.68 |       |
| 102 | TP53    | TUMOR SUPPRESSOR | GENOME INTEGRITY     | chr17 | 7579591   | 7579591   | G             | G   | splicing       | NA                      | c.97-1G>C                       | p.?                    | ?                   | 4         | 1739 | 17.71 |       |
| 102 | TERT    | ONCOGENE         | SENESCENCE           | chr5  | 1295228   | 1295228   | G             | A   | upstream       | NA                      | NA                              | NA                     | NA                  | 1         | 117  | 6.84  |       |
| 103 | FAT1    | TUMOR SUPPRESSOR | DIFFERENTIATION CELL | chr4  | 187524927 | 187524927 | T             | A   | exonic         | stopgain                | c.10753C>T                      | p.(Gln3585Ter)         | Q3585X              | 19        | 2205 | 23.36 |       |
| 103 | ARID1A  | TUMOR SUPPRESSOR | EPIGENETIC           | chr1  | 27094328  | 27094328  | T             | G   | exonic         | stopgain                | c.3036T>G                       | p.(Tyr1012Ter)         | Y1012X              | 11        | 898  | 5.12  |       |
| 103 | ERBB3   | ONCOGENE         | RTK/RAS              | chr2  | 56487277  | 56487277  | C             | T   | exonic         | nonsynonymous_SNV       | c.1423C>T                       | p.(Arg475Trp)          | R475W               | 12        | 1744 | 48.91 |       |
| 103 | HRAS    | ONCOGENE         | RTK/RAS              | chr11 | 534285    | 534285    | C             | A   | exonic         | nonsynonymous_SNV       | c.38G>T                         | p.(Gly13Val)           | G13V                | 2         | 3605 | 20.06 |       |
| 103 | TERT    | ONCOGENE         | SENESCENCE           | chr5  | 1295228   | 1295228   | G             | A   | upstream       | NA                      | NA                              | NA                     | NA                  | 1         | 153  | 22.22 |       |
| 104 | FBX     | TUMOR SUPPRESSOR | CELL CYCLE           | chr13 | 49039340  | 49039340  | G             | A   | splicing       | NA                      | c.2326-1G>A                     | p.?                    | ?                   | 23        | 240  | 76.6  |       |
| 104 | ARID2   | TUMOR SUPPRESSOR | DEVELOPMENT          | chr17 | 6354354   | 6354354   | G             | A   | exonic         | stopgain                | c.3895>T                        | p.(Arg129Ter)          | R129X               | 2         | 289  | 5.14  |       |
| 104 | EP300   | TUMOR SUPPRESSOR | EPIGENETIC           | chr22 | 41572367  | 41572368  | G             | G   | CGCAAGGGACAAAC | in-frame_insertion      | c.4901_4918dup                  | p.(Ala1634_Leu1639dup) | A1634_L1639dup      | 30        | 1315 | 17    |       |
| 104 | EP300   | TUMOR SUPPRESSOR | EPIGENETIC           | chr22 | 41572367  | NA        | G             | G   | CGCAAGGGACAAAC | nonframeshift_insertion | .4896_4897insCTGGCAAGGACAAAGCAC | p.T1632delinsTLARDKH   | T1632delinsTLARDKH  | NA        | 1353 | 17    |       |
| 104 | AJU8A   | TUMOR SUPPRESSOR | OTHER                | chr14 | 23450639  | 23450640  | A             | A   | CAT            | exonic                  | frameshift_insertion            | c.836_837insCT         | p.(Glu279AspfsTer3) | E279DfsX3 | 1    | 3964  | 36.05 |
| 104 | CTCF    | TUMOR SUPPRESSOR | CHROMATIN FACTOR     | chr16 | 67645197  | 67645198  | C             | A   | exonic         | frameshift_insertion    | c.463dup                        | p.(Cys1155LeufsTer8)   | C1155LfsX8          | 3         | 3280 | 38.23 |       |
| 104 | SRCAP   | TUMOR SUPPRESSOR | OTHER                | chr16 | 30747910  | 30747910  | G             | T   | exonic         | stopgain                | c.6973G>T                       | p.(Glu2325Ter)         | E2325X              | 33        | 1585 | 24.61 |       |
| 104 | MAPK1   | ONCOGENE         | RTK/RAS              | chr22 | 22127164  | 22127164  | C             | T   | onic:splice    | nonsynonymous_SNV       | c.964G>A                        | p.(Glu322Lys)          | E322K               | 7         | 1943 | 38.7  |       |
| 104 | TERT    | ONCOGENE         | SENESCENCE           | chr5  | 1295228   | 1295228   | G             | A   | upstream       | NA                      | NA                              | NA                     | NA                  | 1         | 370  | 62.43 |       |
| 105 | CASP8   | TUMOR SUPPRESSOR | APOPTOSIS            | chr2  | 202136252 | 202136252 | C             | T   | exonic         | stopgain                | c.415C>T                        | p.(Gln139Ter)          | Q139X               | 5         | 1355 | 15.87 |       |
| 105 | CDKN2A  | TUMOR SUPPRESSOR | CELL CYCLE           | chr9  | 21971120  | 21971120  | G             | A   | exonic         | stopgain                | c.238C>T                        | p.(Arg80Ter)           | R80X                | 2         | 2205 | 44.26 |       |
| 105 | FAT1    | TUMOR SUPPRESSOR | DIFFERENTIATION CELL | chr4  | 187539417 | 187539417 | G             | A   | exonic         | stopgain                | c.8323C>T                       | p.(Gln2775Ter)         | Q2775X              | 10        | 2983 | 39.69 |       |
| 105 | NSD1    | BOTH             | EPIGENETIC           | chr5  | 176638489 | 176638489 | T             | A   | exonic         | stopgain                | c.3089T>A                       | p.(Leu1030Ter)         | L1030X              | 5         | 3121 | 25.79 |       |
| 105 | NFE2L2  | ONCOGENE         | OXYDATIVE STRESS     | chr2  | 178098960 | 178098960 | C             | G   | exonic         | nonsynonymous_SNV       | c.85G>C                         | p.(Asp29His)           | D29H                | 2         | 3099 | 22.14 |       |
| 105 | PIK3CA  | ONCOGENE         | PI3K                 | chr3  | 178952085 | 178952085 | G             | G   | exonic         | nonsynonymous_SNV       | c.3140A>G                       | p.(His1047Arg)         | H1047R              | 21        | 2920 | 21.23 |       |
| 105 | TERT    | ONCOGENE         | SENESCENCE           | chr5  | 1295228   | 1295228   | G             | A   | upstream       | NA                      | NA                              | NA                     | NA                  | 1         | 160  | 13.12 |       |
| 106 | CDKN2A  | TUMOR SUPPRESSOR | CELL CYCLE           | chr9  | 21971050  | 21971051  | CCG           | C   | exonic         | frameshift_deletion     | c.307_308del                    | p.(Arg103AlafsTer16)   | R103AfsX16          | 2         | 2164 | 20.24 |       |
| 106 | CDKN2A  | TUMOR SUPPRESSOR | CELL CYCLE           | chr9  | 21971120  | 21971120  | G             | A   | exonic         | stopgain                | c.238C>T                        | p.(Arg80Ter)           | R80X                | 2         | 1580 | 26.65 |       |
| 106 | CIC     | TUMOR SUPPRESSOR | OTHER                | chr19 | 42796490  | 42796502  | CCCCTGGTACCAG | C   | exonic         | frameshift_deletion     | c.5779_5791del                  | p.(Gly1927ArgfsTer17)  | G1927RfsX17         | 5         | 1563 | 9.15  |       |
| 106 | PXDNL   | TUMOR SUPPRESSOR | OTHER                | chr8  | 52721806  | 52721806  | TG            | T   | exonic         | frameshift_deletion     | c.99del                         | p.(Ser33ArgfsTer8)     | S33RfsX8            | 1         | 1541 | 64.44 |       |
| 106 | PIK3CA  | ONCOGENE         | PI3K                 | chr3  | 178952085 | 178952085 | G             | G   | exonic         | nonsynonymous_SNV       | c.3140A>G                       | p.(His1047Arg)         | H1047R              | 21        | 1033 | 41.43 |       |
| 106 | TERT    | ONCOGENE         | SENESCENCE           | chr5  | 1295228   | 1295228   | A             | A   | upstream       | NA                      | NA                              | NA                     | NA                  | 1         | 112  | 16.07 |       |
| 107 | KANSL1  | TUMOR SUPPRESSOR | EPIGENETIC           | chr17 | 44116480  | 44116480  | C             | A   | exonic         | stopgain                | c.2305G>T                       | p.(Glu769Ter)          | E769X               | 9         | 2416 | 35.6  |       |
| 107 | TP53    | TUMOR SUPPRESSOR | GENOME INTEGRITY     | chr17 | 7577058   | 7577058   | C             | A   | exonic         | stopgain                | c.880G>T                        | p.(Glu294Ter)          | E294X               | 8         | 2423 | 40.98 |       |
| 107 | TP53    | TUMOR SUPPRESSOR | GENOME INTEGRITY     | chr17 | 7578176   | 7578176   | G             | A   | splicing       | NA                      | c.672+1G>T                      | p.?                    | ?                   | 6         | 1737 | 33.39 |       |
| 108 | TP53    | TUMOR SUPPRESSOR | GENOME INTEGRITY     | chr17 | 7577555   | 7577555   | C             | T   | exonic         | stopgain                | c.726C>A                        | p.(Cys242Ter)          | C242X               | 7         | 1059 | 48.63 |       |
| 109 | NOTCH1  | BOTH             | DEVELOPMENT          | chr9  | 139396486 | 139396486 | C             | T   | exonic         | stopgain                | c.5439G>A                       | p.(Trp1813Ter)         | W1813X              | 29        | 1360 | 50.59 |       |
| 109 | TP53    | TUMOR SUPPRESSOR | GENOME INTEGRITY     | chr17 | 7578263   | 7578263   | G             | A   | exonic         | stopgain                | c.586C>T                        | p.(Arg196Ter)          | R196X               | 6         | 2863 | 66.57 |       |
| 109 | SF3B1   | ONCOGENE         | OTHER                | chr2  | 198265453 | 198265453 | C             | T   | exonic         | nonsynonymous_SNV       | c.2704G>A                       | p.(Glu902Lys)          | E902K               | 18        | 32   | 25    |       |
| 110 | FAT1    | TUMOR SUPPRESSOR | DIFFERENTIATION CELL | chr4  | 187539585 | 187539586 | C             | CA  | exonic         | frameshift_insertion    | c.8154dup                       | p.(Gly2719TrpfsTer12)  | G2719WfsX12         | 10        | 2392 | 11.29 |       |
| 110 | NOTCH1  | BOTH             | DEVELOPMENT          | chr9  | 139401003 | 139401009 | CGCGGGCG      | C   | exonic         | frameshift_deletion     | c.3984_3990del                  | p.(Ala1329GlyfsTer114) | A1329GfsX114        | 24        | 1918 | 16.06 |       |
| 110 | TP53    | TUMOR SUPPRESSOR | GENOME INTEGRITY     | chr17 | 7577156   | 7577156   | C             | T   | splicing       | NA                      | NA                              | p.?                    | ?                   | 8         | 996  | 16.97 |       |
| 110 | TERT    | ONCOGENE         |                      |       |           |           |               |     |                |                         |                                 |                        |                     |           |      |       |       |

|     |         |                  |                        |       |           |           |                            |     |                |                      |                      |                            |                       |             |       |       |       |
|-----|---------|------------------|------------------------|-------|-----------|-----------|----------------------------|-----|----------------|----------------------|----------------------|----------------------------|-----------------------|-------------|-------|-------|-------|
| 112 | CHD3    | TUMOR SUPPRESSOR | EPIGENETIC             | chr17 | 7812527   | 7812527   | G                          | T   | exonic         | stopgain             | c.5359G>T            | p.(Glu1787Ter)             | E1787X                | 36          | 1243  | 35.08 |       |
| 112 | TP53    | TUMOR SUPPRESSOR | GENOME INTEGRITY       | chr17 | 7577082   | 7577082   | C                          | T   | exonic         | nonsynonymous_SNV    | c.856G>A             | p.(Glu286Lys)              | E286K                 | 8           | 1156  | 36.25 |       |
| 113 | CDKN2A  | TUMOR SUPPRESSOR | CELL CYCLE             | chr9  | 21971029  | 21971029  | C                          | T   | exonic         | stopgain             | c.329G>A             | p.(Trp110Ter)              | W110X                 | 2           | 1949  | 56.20 |       |
| 113 | FAT1    | TUMOR SUPPRESSOR | DIFFERENTIATION CELL   | chr4  | 187540425 | 187540426 | C                          | CA  | exonic         | frameshift insertion | c.7314dup            | p.(Val2439CysfsTer3)       | V2439CfsX3            | 10          | 1799  | 55.81 |       |
| 113 | BRCA2   | TUMOR SUPPRESSOR | DNA REPAIR             | chr13 | 32972744  | 32972745  | T                          | C   | GAATTATATC     | exonic               | frameshift insertion | c.10094_10095insGAATTATATC | p.(Ser3366AsnfsTer5)  | S3366NfsX5  | 27    | 1083  | 45.61 |
| 113 | BRCA2   | TUMOR SUPPRESSOR | DNA REPAIR             | chr13 | 32972744  | NA        | A                          | T   | GAATTATATC     | exonic               | frameshift insertion | c.10094_10095insGAATTATATC | p.V3365fs             | V3365fs     | NA    | 1104  | 46    |
| 113 | SMARCA4 | TUMOR SUPPRESSOR | EPIGENETIC             | chr19 | 11172458  | 11172458  | T                          | C   | C              | splicing             | NA                   | p.?                        | ?                     | 36          | 1747  | 5.55  |       |
| 113 | TP53    | TUMOR SUPPRESSOR | GENOME INTEGRITY       | chr17 | 7578369   | 7578369   | G                          | C   | G              | splicing             | NA                   | p.559+2T>C                 | p.?                   | 5           | 2556  | 69.91 |       |
| 114 | TP53    | TUMOR SUPPRESSOR | GENOME INTEGRITY       | chr17 | 7578411   | 7578412   | TCA                        | A   | T              | exonic               | frameshift deletion  | c.518_519del               | p.(Val173GlufsTer7)   | V173GfsX7   | 5     | 2140  | 64.35 |
| 115 | TP53    | TUMOR SUPPRESSOR | GENOME INTEGRITY       | chr17 | 7579414   | 7579414   | GC                         | G   | C              | exonic               | frameshift deletion  | c.273del                   | p.(Trp91CysfsTer32)   | W91CfsX32   | 4     | 2068  | 48.94 |
| 115 | TERT    | ONCOGENE         | SENESCENCE             | chr5  | 1295250   | 1295250   | G                          | A   | A              | upstream             | NA                   | NA                         | NA                    | 1           | 202   | 51.49 |       |
| 116 | CASP8   | TUMOR SUPPRESSOR | APOPTOSIS              | chr2  | 202149718 | 202149718 | G                          | T   | exonic         | stopgain             | c.1033G>T            | p.(Gly345Ter)              | G345X                 | 9           | 1517  | 11.8  |       |
| 116 | CDKN2A  | TUMOR SUPPRESSOR | CELL CYCLE             | chr9  | 21971186  | 21971186  | G                          | A   | exonic         | stopgain             | c.172C>T             | p.(Arg58Ter)               | R58X                  | 2           | 1098  | 14.48 |       |
| 116 | TP53    | TUMOR SUPPRESSOR | GENOME INTEGRITY       | chr17 | 7578212   | 7578212   | A                          | A   | exonic         | stopgain             | c.637C>T             | p.(Arg213Ter)              | R213X                 | 6           | 950   | 16.11 |       |
| 117 | SUZ12   | TUMOR SUPPRESSOR | EPIGENETIC             | chr17 | 30267480  | 30267480  | C                          | T   | exonic         | stopgain             | c.361G>T             | p.(Arg121Ter)              | R121X                 | 3           | 618   | 8.74  |       |
| 117 | TP53    | TUMOR SUPPRESSOR | GENOME INTEGRITY       | chr17 | 7577082   | 7577082   | A                          | A   | exonic         | stopgain             | c.856G>T             | p.(Glu286Ter)              | E286X                 | 8           | 1035  | 74.01 |       |
| 117 | RASA1   | TUMOR SUPPRESSOR | RTK/RAS                | chr5  | 86645120  | 86645120  | C                          | T   | exonic         | stopgain             | c.1192C>T            | p.(Arg398Ter)              | R398X                 | 8           | 567   | 57.79 |       |
| 117 | TERT    | ONCOGENE         | SENESCENCE             | chr5  | 1295228   | 1295228   | G                          | A   | A              | upstream             | NA                   | NA                         | NA                    | 1           | 115   | 17.38 |       |
| 118 | CDKN2A  | TUMOR SUPPRESSOR | CELL CYCLE             | chr9  | 21971147  | 21971154  | T                          | T   | TTGGGCTCC      | exonic               | frameshift deletion  | c.204_211del               | p.(Glu69LufsTer48)    | E69LfsX48   | 2     | 1449  | 20.77 |
| 118 | MEN1    | TUMOR SUPPRESSOR | OTHER                  | chr11 | 64571895  | 64571895  | A                          | A   | exonic         | stopgain             | c.1744C>T            | p.(Gln582Ter)              | O582X                 | 10          | 1498  | 24.17 |       |
| 119 | FAT1    | TUMOR SUPPRESSOR | DIFFERENTIATION CELL   | chr4  | 187557883 | 187557901 | T                          | A   | exonic         | frameshift deletion  | c.3810_3828del       | p.(Leu1271ProfsTer91)      | L1271PfsX91           | 5           | 1674  | 9.8   |       |
| 119 | FAT1    | TUMOR SUPPRESSOR | DIFFERENTIATION CELL   | chr4  | 187630588 | 187630588 | G                          | A   | exonic         | stopgain             | c.394C>T             | p.(Arg132Ter)              | R132X                 | 2           | 1161  | 23    |       |
| 119 | BRIP1   | TUMOR SUPPRESSOR | DNA REPAIR             | chr17 | 59886079  | 59886079  | G                          | A   | exonic         | stopgain             | c.667C>T             | p.(Gln223Ter)              | Q223X                 | 7           | 205   | 5.85  |       |
| 119 | TP53    | TUMOR SUPPRESSOR | GENOME INTEGRITY       | chr17 | 7577139   | 7577139   | G                          | C   | A              | exonic               | nonsynonymous_SNV    | c.799C>G                   | p.(Arg267Gly)         | R267G       | 8     | 728   | 19.78 |
| 119 | BAR1    | TUMOR SUPPRESSOR | DNA REPAIR             | chr2  | 215610497 | 215610497 | G                          | A   | exonic         | stopgain             | c.1759G>T            | p.(Glu587Ter)              | E587X                 | 8           | 208   | 5.29  |       |
| 119 | EPHA2   | TUMOR SUPPRESSOR | OTHER                  | chr1  | 16451778  | 16451778  | C                          | A   | exonic         | stopgain             | c.2863C>T            | p.(Gln955Ter)              | Q955X                 | 17          | 2196  | 18.26 |       |
| 119 | TERT    | ONCOGENE         | SENESCENCE             | chr5  | 1295228   | 1295228   | G                          | A   | A              | upstream             | NA                   | NA                         | NA                    | 1           | 127   | 23.62 |       |
| 120 | SMARCA4 | TUMOR SUPPRESSOR | EPIGENETIC             | chr19 | 11141427  | 11141427  | CG                         | C   | A              | exonic               | frameshift deletion  | c.3407del                  | p.(Gly1136AlafsTer4)  | G1136AfsX4  | 25    | 1197  | 12.61 |
| 120 | TP53    | TUMOR SUPPRESSOR | GENOME INTEGRITY       | chr17 | 7578290   | 7578290   | G                          | A   | A              | splicing             | NA                   | c.560-1G>T                 | p.?                   | 6           | 2265  | 33.42 |       |
| 120 | TP53    | TUMOR SUPPRESSOR | GENOME INTEGRITY       | chr17 | 7578272   | 7578272   | C                          | T   | exonic         | nonsynonymous_SNV    | c.577C>A             | p.(His193Asn)              | H193N                 | 6           | 2083  | 34.47 |       |
| 120 | FBXO11  | TUMOR SUPPRESSOR | OTHER                  | chr2  | 48040461  | 48040461  | C                          | T   | exonic         | stopgain             | c.2139G>A            | p.(Trp713Ter)              | W713X                 | 18          | 1199  | 6.26  |       |
| 121 | CDKN2A  | TUMOR SUPPRESSOR | CELL CYCLE             | chr9  | 21968242  | 21968242  | C                          | T   | splicing       | NA                   | c.458-1G>A           | p.?                        | 3                     | 445         | 21.35 |       |       |
| 121 | TP53    | TUMOR SUPPRESSOR | GENOME INTEGRITY       | chr17 | 7577556   | 7577556   | C                          | T   | exonic         | nonsynonymous_SNV    | c.725G>A             | p.(Cys242Tyr)              | C242Y                 | 7           | 846   | 40.54 |       |
| 121 | MGA     | TUMOR SUPPRESSOR | MYC                    | chr15 | 41988829  | 41988829  | C                          | T   | exonic         | stopgain             | c.1621C>T            | p.(Gln541Ter)              | O541X                 | 3           | 635   | 16.69 |       |
| 122 | CASP8   | TUMOR SUPPRESSOR | APOPTOSIS              | chr2  | 202151270 | 202151270 | C                          | T   | exonic         | stopgain             | c.1444C>T            | p.(Gln482Ter)              | Q482X                 | 10          | 752   | 17.02 |       |
| 122 | TERT    | ONCOGENE         | SENESCENCE             | chr5  | 1295228   | 1295228   | G                          | A   | A              | upstream             | NA                   | NA                         | NA                    | 1           | 153   | 12.42 |       |
| 123 | SAMD9   | TUMOR SUPPRESSOR | APOPTOSIS              | chr7  | 92735258  | 92735258  | CT                         | C   | exonic         | frameshift deletion  | c.153del             | p.(Glu52AsnfsTer16)        | E52NfsX16             | 3           | 2494  | 12.15 |       |
| 123 | FAT1    | TUMOR SUPPRESSOR | DIFFERENTIATION CELL   | chr4  | 187629667 | 187629668 | T                          | TTG | exonic         | frameshift insertion | c.1314_1315insCA     | p.(Thr439GlnfsTer14)       | T439GfsX14            | 2           | 1587  | 20.48 |       |
| 123 | MSH6    | TUMOR SUPPRESSOR | DNA REPAIR             | chr2  | 48033780  | 48033780  | C                          | T   | exonic         | stopgain             | c.3991C>T            | p.(Arg1331Ter)             | R1331X                | 9           | 695   | 18.56 |       |
| 123 | NCOR1   | TUMOR SUPPRESSOR | SCRIPTION FACTOR-REGUL | chr17 | 15952262  | 15952263  | C                          | A   | CCGAAGAGA      | exonic               | frameshift insertion | c.6425_6432dup             | p.(Glu2145SerfsTer47) | E2145SfsX47 | 41    | 1947  | 13.76 |
| 123 | KMT2B   | TUMOR SUPPRESSOR | EPIGENETIC             | chr19 | 36211183  | 36211183  | CA                         | C   | exonic         | frameshift deletion  | c.939del             | p.(Val314Ter)              | V314X                 | 3           | 2485  | 15.13 |       |
| 123 | SETD2   | TUMOR SUPPRESSOR | EPIGENETIC             | chr3  | 47139465  | 47139465  | G                          | A   | exonic         | stopgain             | c.5122C>T            | p.(Arg1708Ter)             | R1708X                | 9           | 1544  | 17.1  |       |
| 123 | ATM     | TUMOR SUPPRESSOR | GENOME INTEGRITY       | chr11 | 108121536 | 108121537 | TG                         | T   | exonic         | frameshift insertion | c.1348dup            | p.(Glu450GlyfsTer37)       | E450GfsX37            | 10          | 1603  | 8.05  |       |
| 123 | ALPK2   | TUMOR SUPPRESSOR | OTHER                  | chr18 | 56278986  | 56278986  | A                          | T   | exonic         | stopgain             | c.441T>A             | p.(Leu15Ter)               | L15X                  | 2           | 946   | 11.42 |       |
| 123 | EPHA2   | TUMOR SUPPRESSOR | OTHER                  | chr1  | 16462199  | 16462199  | CG                         | C   | exonic         | frameshift deletion  | c.1379del            | p.(Pro460ArgfsTer33)       | P460RfsX33            | 6           | 1356  | 28.47 |       |
| 123 | FUBP1   | TUMOR SUPPRESSOR | OTHER                  | chr1  | 78444659  | 78444659  | AG                         | A   | exonic         | frameshift deletion  | c.30del              | p.(Ser11LufsTer43)         | S11LfsX43             | 18          | 1097  | 8.93  |       |
| 123 | MAPK1   | ONCOGENE         | RTK/RAS                | chr22 | 22127164  | 22127164  | C                          | T   | exonic:splice  | nonsynonymous_SNV    | c.964G>A             | p.(Glu322Lys)              | E322K                 | 7           | 1306  | 16.54 |       |
| 123 | TERT    | ONCOGENE         | SENESCENCE             | chr5  | 1295228   | 1295228   | G                          | A   | A              | upstream             | NA                   | NA                         | NA                    | 1           | 147   | 15.65 |       |
| 124 | CASP8   | TUMOR SUPPRESSOR | APOPTOSIS              | chr2  | 202150399 | 202150399 | C                          | T   | exonic:splice  | stopgain             | c.1354C>T            | p.(Arg352Ter)              | R452X                 | 1           | 1967  | 21.19 |       |
| 124 | FAT1    | TUMOR SUPPRESSOR | DIFFERENTIATION CELL   | chr4  | 187522440 | 187522441 | C                          | CA  | exonic         | frameshift insertion | c.11622dup           | p.(Asp3875Ter)             | D3875X                | 21          | 1001  | 20.98 |       |
| 124 | KANSL1  | TUMOR SUPPRESSOR | EPIGENETIC             | chr17 | 44248368  | 44248368  | CT                         | C   | exonic         | frameshift deletion  | c.1142del            | p.(Glu381GlyfsTer8)        | E381GfsX8             | 2           | 3113  | 9.44  |       |
| 124 | TP53    | TUMOR SUPPRESSOR | GENOME INTEGRITY       | chr17 | 7579349   | 7579349   | A                          | G   | exonic         | nonsynonymous_SNV    | c.338T>C             | p.(Phe113Ser)              | F113S                 | 4           | 823   | 42.77 |       |
| 124 | HRAS    | ONCOGENE         | RTK/RAS                | chr11 | 534285    | 534285    | C                          | A   | exonic         | nonsynonymous_SNV    | c.38G>T              | p.(Gly13Val)               | G13V                  | 2           | 2862  | 17.37 |       |
| 126 | NOTCH2  | BOTH             | DEVELOPMENT            | chr1  | 120509099 | 120509100 | GCA                        | G   | exonic         | frameshift deletion  | c.1466_1467del       | p.(Val489AlafsTer3)        | V489AfsX3             | 9           | 232   | 5.17  |       |
| 126 | TP53    | TUMOR SUPPRESSOR | GENOME INTEGRITY       | chr17 | 7577535   | 7577535   | C                          | A   | exonic         | nonsynonymous_SNV    | c.746G>T             | p.(Arg249Met)              | R249M                 | 7           | 1025  | 53.85 |       |
| 127 | CDKN2A  | TUMOR SUPPRESSOR | CELL CYCLE             | chr9  | 21971028  | 21971028  | C                          | T   | exonic         | stopgain             | c.330G>A             | p.(Trp110Ter)              | W110X                 | 2           | 2734  | 73.88 |       |
| 127 | FAT1    | TUMOR SUPPRESSOR | DIFFERENTIATION CELL   | chr4  | 187629671 | 187629684 | T                          | C   | CTTCAAGTTCAAAT | exonic               | frameshift deletion  | c.1298_1311del             | p.(His433ArgfsTer5)   | H433RfsX5   | 2     | 453   | 19.43 |
| 127 | ATR     | TUMOR SUPPRESSOR | DNA REPAIR             | chr3  | 142218512 | 142218512 | C                          | T   | exonic         | stopgain             | c.5337G>A            | p.(Trp1779Ter)             | W1779X                | 31          | 252   | 5.56  |       |
| 127 | ATR     | TUMOR SUPPRESSOR | DNA REPAIR             | chr3  | 142218513 | 142218513 | C                          | T   | exonic         | stopgain             | c.5336G>A            | p.(Trp1779Ter)             | W1779X                | 31          | 249   | 5.62  |       |
| 127 | TP53    | TUMOR SUPPRESSOR | GENOME INTEGRITY       | chr17 | 7578437   | 7578437   | G                          | A   | exonic         | stopgain             | c.493C>T             | p.(Gln165Ter)              | Q165X                 | 5           | 2965  | 80.91 |       |
| 127 | PIK3CA  | ONCOGENE         | PI3K                   | chr3  | 178916929 | 178916929 | G                          | A   | exonic         | nonsynonymous_SNV    | c.316G>A             | p.(Gly106Ser)              | G106S                 | 2           | 107   | 8.41  |       |
| 127 | TERT    | ONCOGENE         | SENESCENCE             | chr5  | 1295250   | 1295250   | G                          | A   | A              | upstream             | NA                   | NA                         | NA                    | 1           | 236   | 58.05 |       |
| 128 | FAT2    | TUMOR SUPPRESSOR | DIFFERENTIATION CELL   | chr5  | 150906800 | 150906803 | ACAGT                      | A   | exonic:splice  | frameshift deletion  | c.10300_10303del     | p.(Thr3435SerfsTer14)      | T3435SfsX14           | 16          | 450   | 46.89 |       |
| 128 | NSD1    | BOTH             | EPIGENETIC             | chr5  | 176638911 | 176638948 | CCGCATGAACAGATTTAAAGAGAAAG | T   | exonic         | frameshift deletion  | c.3511_3548del       | p.(Arg1171Ter)             | R1171X                | 5           | 1115  | 11.84 |       |
| 128 | TP53    | TUMOR SUPPRESSOR | GENOME INTEGRITY       | chr17 | 7579419   | 7579420   | ACT                        | A   | exonic         | frameshift insertion | c.267_268insAG       | p.(Trp91ProfsTer33)        | W91PfsX33             | 4           | 1530  | 56.86 |       |
| 130 | TP53    | TUMOR SUPPRESSOR | GENOME INTEGRITY       | chr17 | 7579485   | 7579485   | C                          | A   | exonic         | stopgain             | c.202G>T             | p.(Glu68Ter)               | E68X                  | 4           | 1224  | 24.18 |       |
| 130 | TERT    | ONCOGENE         | SENESCENCE             | chr5  | 1295228   | 1295228   | G                          | A   | A              | upstream             | NA                   | NA                         | NA                    | 1           | 168   | 23.21 |       |
| 131 | FAT1    | TUMOR SUPPRESSOR | DIFFERENTIATION CELL   | chr4  | 187540784 | 187540784 | G                          | C   | exonic         | stopgain             | c.6956C>G            | p.(Ser2319Ter)             | S2319X                | 10          | 1840  | 12.99 |       |
| 131 | TP53    | TUMOR SUPPRESSOR | GENOME INTEGRITY       | chr17 | 7578291   | 7578291   | T                          | C   | A              | splicing             | NA                   | c.560-2A>T                 | p.?                   | 6           | 3500  | 30.06 |       |
| 131 | CIC     | TUMOR SUPPRESSOR | OTHER                  | chr19 | 42796616  | 42796616  | C                          | G   | exonic:splice  | stopgain             | c.5900C>G            | p.(Ser1967Ter)             | S1967X                | 5           | 1964  | 14.46 |       |
| 131 | HRAS    | ONCOGENE         | RTK/RAS                | chr11 | 533874    | 533874    | T                          | C   | exonic         | nonsynonymous_SNV    | c.182A>G             | p.(Gln61Arg)               | Q61R                  | 3           | 4140  | 15.87 |       |
| 131 | MAPK1   | ONCOGENE         | RTK/RAS                | chr22 | 22127164  | 22127164  | T                          | G   | exonic:splice  | nonsynonymous_SNV    | c.964G>A             | p.(Glu322Lys)              | E322K                 | 7           | 1790  | 29.39 |       |
| 132 | NSD1    | BOTH             | EPIGENETIC             | chr5  | 176637649 | 176637652 | GCTCT                      | G   | exonic         | frameshift deletion  | c.2254_2257del       | p.(Ser752GlnfsTer15)       | S752GfsX15            | 5           | 3168  | 16.45 |       |
| 132 | AJUBA   | TUMOR SUPPRESSOR | OTHER                  | chr14 | 23450492  | 23450493  | T                          | TGG | exonic         | frameshift insertion | c.982_983dup         | p.(Glu329GlnfsTer82)       | E329GfsX82            | 1           | 2342  | 13.92 |       |
| 132 | TERT    | ONCOGENE         | SENESCENCE             | chr5  | 1295228   | 1295228   | A                          | A   | upstream       | NA                   | NA                   | NA                         | NA                    | 1           | 163   | 14.11 |       |
| 133 | ARID2   | TUMOR SUPPRESSOR | EPIGENETIC             | chr12 | 46246629  | 46246629  | C                          | T   | exonic         | stopgain             | c.4723C>T            | p.(Gln1575Ter)             | Q1575X                | 15          | 720   | 13.61 |       |
| 133 | KMT2B   | TUMOR SUPPRESSOR | EPIGENETIC             | chr19 | 36209188  | 36209188  | C                          | T   | exonic         | stopgain             | c.268C>T             | p.(Gln90Ter)               | Q90X                  | 1           | 707   | 18.81 |       |
| 133 | KMT2B   | TUMOR SUPPRESSOR | EPIGENETIC             | chr19 | 36218689  | 36218689  | G                          | T   | splicing       | NA                   | c.4392-1G>T          | p.?                        | 17                    | 2297        | 16.11 |       |       |
| 133 | TERT    | ONCOGENE         | SENESCENCE             | chr5  | 1295228   | 1295228   | G                          | A   | A              | upstream             | NA                   | NA                         | NA                    | 1           | 176   | 19.89 |       |

|     |         |                  |                        |       |           |           |             |    |              |                      |                |                      |            |      |       |       |
|-----|---------|------------------|------------------------|-------|-----------|-----------|-------------|----|--------------|----------------------|----------------|----------------------|------------|------|-------|-------|
| 135 | KMT2C   | TUMOR SUPPRESSOR | EPIGENETIC             | chr7  | 151927082 | 151927082 | G           | A  | exonic       | stopgain             | c.2902C>T      | p.(Gln968Ter)        | Q968X      | 18   | 244   | 7.38  |
| 135 | TP53    | TUMOR SUPPRESSOR | GENOME INTEGRITY       | chr17 | 7579420   | 7579420   | AG          | A  | exonic       | frameshift_deletion  | c.267del       | p.(Ser90ProfsTer33)  | S90PfsX33  | 4    | 2432  | 25.74 |
| 135 | HNF1A   | TUMOR SUPPRESSOR | SCRIPTION FACTOR-REGUL | chr12 | 121434361 | 121434361 | GC          | G  | exonic       | frameshift_deletion  | c.1129del      | p.(Leu377SerfsTer7)  | L377SfsX7  | 6    | 4955  | 13.64 |
| 135 | TERT    | ONCOGENE         | SENESCENCE             | chr5  | 1295250   | 1295250   | G           | A  | upstream     | NA                   | NA             | NA                   | 1          | 176  | 18.75 |       |
| 136 | CDKN2A  | TUMOR SUPPRESSOR | CELL CYCLE             | chr9  | 21971120  | 21971120  | G           | A  | exonic       | stopgain             | c.238C>T       | p.(Arg80Ter)         | R80X       | 2    | 2396  | 36.81 |
| 136 | FAT1    | TUMOR SUPPRESSOR | DIFFERENTIATION CELL   | chr4  | 187629184 | 187629184 | G           | A  | exonic       | stopgain             | c.1798C>T      | p.(Gln600Ter)        | Q600X      | 2    | 564   | 17.38 |
| 136 | NOTCH1  | BOTH             | DEVELOPMENT            | chr9  | 139405231 | 139405231 | C           | A  | exonic       | stopgain             | c.2614G>T      | p.(Glu872Ter)        | E872X      | 17   | 3745  | 17.54 |
| 136 | KMT2D   | TUMOR SUPPRESSOR | EPIGENETIC             | chr12 | 49436527  | 49436527  | G           | A  | onic:splicei | stopgain             | c.5779C>T      | p.(Gln1927Ter)       | Q1927X     | 26   | 1969  | 22.35 |
| 136 | TP53    | TUMOR SUPPRESSOR | GENOME INTEGRITY       | chr17 | 7578406   | 7578406   | C           | T  | exonic       | nonsynonymous_SNV    | c.524G>A       | p.(Arg175His)        | R175H      | 5    | 2990  | 36.15 |
| 136 | TERT    | ONCOGENE         | SENESCENCE             | chr5  | 1295228   | 1295228   | G           | A  | upstream     | NA                   | NA             | NA                   | 1          | 285  | 16.14 |       |
| 137 | KMT2D   | TUMOR SUPPRESSOR | EPIGENETIC             | chr12 | 49437448  | 49437448  | C           | A  | exonic       | stopgain             | c.5437G>T      | p.(Glu1813Ter)       | E1813X     | 23   | 900   | 40    |
| 137 | TP53    | TUMOR SUPPRESSOR | GENOME INTEGRITY       | chr17 | 7578213   | 7578213   | GA          | G  | exonic       | frameshift_deletion  | c.636del       | p.(Arg213AspfsTer34) | R213DfsX34 | 6    | 1011  | 59.94 |
| 137 | P1EN    | TUMOR SUPPRESSOR | PI3K                   | chr10 | 89720808  | 89720809  | TTA         | T  | exonic       | frameshift_deletion  | c.959_960del   | p.(Leu320TyrfsTer4)  | L320YfsX4  | 8    | 365   | 76.44 |
| 138 | TP53    | TUMOR SUPPRESSOR | GENOME INTEGRITY       | chr17 | 7578178   | 7578178   | CTCAGGCGGCT | C  | onic:splicei | frameshift_deletion  | c.662_671del   | p.(Glu221GlyfsTer23) | E221GfsX23 | 7    | 1274  | 54.95 |
| 138 | TP53    | TUMOR SUPPRESSOR | GENOME INTEGRITY       | chr17 | 7578177   | NA        | .           | T  | exonic       | frameshift_deletion  | c.662_672del   | p.E221fs             | NA         | 1309 | 55    |       |
| 138 | NFE2L2  | ONCOGENE         | OXYDATIVE STRESS       | chr2  | 178098944 | 178098944 | C           | G  | exonic       | nonsynonymous_SNV    | c.101G>C       | p.(Arg34Pro)         | R34P       | 2    | 200   | 36.5  |
| 139 | CASP9   | TUMOR SUPPRESSOR | APOPTOSIS              | chr2  | 202149738 | 202149738 | T           | A  | exonic       | stopgain             | c.1053T>A      | p.(Tyr351Ter)        | Y351X      | 9    | 3932  | 12.13 |
| 139 | NOTCH1  | BOTH             | DEVELOPMENT            | chr9  | 139438555 | 139438555 | C           | A  | splicing     | NA                   | p.?            | ?                    | 2          | 4086 | 12.11 |       |
| 139 | TP53    | TUMOR SUPPRESSOR | GENOME INTEGRITY       | chr17 | 7579536   | 7579536   | C           | C  | exonic       | stopgain             | c.151G>T       | p.(Glu51Ter)         | E51X       | 4    | 4492  | 6.1   |
| 139 | NFE2L2  | ONCOGENE         | OXYDATIVE STRESS       | chr2  | 178098810 | 178098810 | C           | G  | exonic       | nonsynonymous_SNV    | c.235G>C       | p.(Glu79Gln)         | E79Q       | 2    | 3777  | 5.61  |
| 139 | TERT    | ONCOGENE         | SENESCENCE             | chr5  | 1295250   | 1295250   | G           | A  | upstream     | NA                   | NA             | NA                   | 1          | 189  | 6.88  |       |
| 140 | CITA    | TUMOR SUPPRESSOR | IMMUNITY               | chr16 | 11017183  | 11017183  | G           | T  | splicing     | NA                   | c.'22>1G>T     | p.?                  | 19         | 222  | 5.41  |       |
| 141 | FAT1    | TUMOR SUPPRESSOR | DIFFERENTIATION CELL   | chr4  | 187540539 | 187540539 | C           | A  | exonic       | stopgain             | c.7201G>T      | p.(Glu2401Ter)       | E2401X     | 10   | 1777  | 16.66 |
| 141 | BRCA2   | TUMOR SUPPRESSOR | DNA REPAIR             | chr13 | 32972611  | 32972611  | C           | T  | exonic       | stopgain             | c.9961C>T      | p.(Gln3321Ter)       | Q3321X     | 27   | 1183  | 13.52 |
| 141 | NOTCH1  | BOTH             | DEVELOPMENT            | chr9  | 139402568 | 139402568 | G           | A  | exonic       | stopgain             | c.3349C>T      | p.(Gln1117Ter)       | Q1117X     | 21   | 2903  | 12.92 |
| 141 | TP53    | TUMOR SUPPRESSOR | GENOME INTEGRITY       | chr17 | 7579414   | 7579414   | C           | T  | exonic       | stopgain             | c.273G>A       | p.(Trp911Ter)        | W911X      | 4    | 1242  | 33.82 |
| 141 | CIC     | TUMOR SUPPRESSOR | OTHER                  | chr19 | 42796331  | 42796331  | C           | T  | exonic       | stopgain             | c.5707C>T      | p.(Gln1903Ter)       | Q1903X     | 5    | 3055  | 11.16 |
| 141 | L2TR1   | TUMOR SUPPRESSOR | OTHER                  | chr22 | 21342297  | 21342297  | A           | G  | splicing     | NA                   | c.401-2A>G     | p.?                  | 5          | 1378 | 51.38 |       |
| 142 | CDKN2A  | TUMOR SUPPRESSOR | CELL CYCLE             | chr9  | 21971130  | 21971130  | TG          | T  | exonic       | frameshift_deletion  | c.228del       | p.(Thr77LeufsTer69)  | T77LfsX69  | 2    | 3197  | 11.79 |
| 142 | CDKN2A  | TUMOR SUPPRESSOR | CELL CYCLE             | chr9  | 21971186  | 21971186  | G           | A  | exonic       | stopgain             | c.172C>T       | p.(Arg58Ter)         | R58X       | 2    | 2913  | 29.93 |
| 142 | TP53    | TUMOR SUPPRESSOR | GENOME INTEGRITY       | chr17 | 7577085   | 7577085   | C           | T  | exonic       | nonsynonymous_SNV    | c.853G>A       | p.(Glu285Lys)        | E285K      | 8    | 1456  | 21.91 |
| 142 | TERT    | ONCOGENE         | SENESCENCE             | chr5  | 1295228   | 1295228   | G           | A  | upstream     | NA                   | NA             | NA                   | 1          | 231  | 16.45 |       |
| 144 | TP53BP1 | TUMOR SUPPRESSOR | DNA REPAIR             | chr15 | 43712685  | 43712685  | C           | T  | exonic       | stopgain             | c.4484G>A      | p.(Trp1495Ter)       | W1495X     | 21   | 1724  | 5.97  |
| 144 | B2M     | TUMOR SUPPRESSOR | IMMUNITY               | chr15 | 45003781  | 45003782  | ACT         | A  | exonic       | frameshift_deletion  | c.43_44del     | p.(Leu15PhefsTer41)  | L15PfsX41  | 1    | 2584  | 5.19  |
| 144 | TERT    | ONCOGENE         | SENESCENCE             | chr5  | 1295228   | 1295228   | G           | A  | upstream     | NA                   | NA             | NA                   | 1          | 257  | 10.89 |       |
| 145 | FAT1    | TUMOR SUPPRESSOR | DIFFERENTIATION CELL   | chr4  | 187629907 | 187629907 | G           | A  | exonic       | stopgain             | c.1075C>T      | p.(Gln359Ter)        | Q359X      | 2    | 1267  | 67.17 |
| 145 | APC2    | TUMOR SUPPRESSOR | DEVELOPMENT            | chr19 | 1460220   | 1460220   | T           | G  | exonic       | stopgain             | c.1344T>G      | p.(Tyr448Ter)        | Y448X      | 11   | 1515  | 5.08  |
| 145 | TP53    | TUMOR SUPPRESSOR | GENOME INTEGRITY       | chr17 | 7576896   | 7576897   | T           | TG | exonic       | frameshift_insertion | c.949dup       | p.(Gln317ProfsTer20) | Q317PfsX20 | 9    | 1320  | 68.26 |
| 145 | PIK3CA  | ONCOGENE         | PI3K                   | chr3  | 178952085 | 178952085 | A           | G  | exonic       | nonsynonymous_SNV    | c.3140A>G      | p.(His1047Arg)       | H1047R     | 21   | 3639  | 40.86 |
| 145 | TERT    | ONCOGENE         | SENESCENCE             | chr5  | 1295228   | 1295228   | G           | A  | upstream     | NA                   | NA             | NA                   | 1          | 104  | 47.12 |       |
| 146 | TP53    | TUMOR SUPPRESSOR | GENOME INTEGRITY       | chr17 | 7577065   | 7577065   | TC          | T  | exonic       | frameshift_deletion  | c.873del       | p.(Glu294SerfsTer51) | E294SfsX51 | 8    | 1030  | 36.41 |
| 147 | TP53    | TUMOR SUPPRESSOR | GENOME INTEGRITY       | chr17 | 7578275   | 7578275   | G           | A  | exonic       | stopgain             | c.574C>T       | p.(Gln192Ter)        | Q192X      | 6    | 2587  | 27.29 |
| 147 | TERT    | ONCOGENE         | SENESCENCE             | chr5  | 1295250   | 1295250   | G           | A  | upstream     | NA                   | NA             | NA                   | 1          | 108  | 13.89 |       |
| 148 | FAT1    | TUMOR SUPPRESSOR | DIFFERENTIATION CELL   | chr4  | 187628687 | NA        | .           | T  | exonic       | frameshift_deletion  | c.2280_2295del | p.N760fs             | N760fs     | NA   | 1280  | 20    |
| 148 | TP53    | TUMOR SUPPRESSOR | GENOME INTEGRITY       | chr17 | 7577580   | 7577580   | T           | C  | exonic       | nonsynonymous_SNV    | c.701A>G       | p.(Tyr234Cys)        | Y234C      | 7    | 2999  | 84.53 |
| 148 | TP53    | TUMOR SUPPRESSOR | GENOME INTEGRITY       | chr17 | 7578235   | 7578235   | T           | C  | exonic       | nonsynonymous_SNV    | c.614A>G       | p.(Tyr205Cys)        | Y205C      | 6    | 5269  | 7.76  |
| 151 | CDKN2A  | TUMOR SUPPRESSOR | CELL CYCLE             | chr9  | 21971120  | 21971120  | G           | A  | exonic       | stopgain             | c.238C>T       | p.(Arg80Ter)         | R80X       | 2    | 2122  | 45.38 |
| 151 | FAT1    | TUMOR SUPPRESSOR | DIFFERENTIATION CELL   | chr4  | 187541913 | 187541913 | G           | A  | exonic       | stopgain             | c.5827C>T      | p.(Gln1943Ter)       | Q1943X     | 10   | 1996  | 16.13 |
| 151 | FAT1    | TUMOR SUPPRESSOR | DIFFERENTIATION CELL   | chr4  | 187628809 | 187628809 | G           | A  | exonic       | stopgain             | c.2173C>T      | p.(Gln725Ter)        | Q725X      | 2    | 1744  | 16.51 |
| 151 | MGA     | TUMOR SUPPRESSOR | MYC                    | chr15 | 42005562  | 42005562  | C           | T  | exonic       | stopgain             | c.3288C>T      | p.(Gln1100Ter)       | Q1100X     | 9    | 1412  | 17    |
| 151 | PIK3CA  | ONCOGENE         | PI3K                   | chr3  | 178936091 | 178936091 | G           | A  | exonic       | nonsynonymous_SNV    | c.1633G>A      | p.(Glu545Lys)        | E545K      | 10   | 512   | 12.7  |
| 151 | HRAS    | ONCOGENE         | RTK/RAS                | chr11 | 534288    | 534288    | C           | T  | exonic       | nonsynonymous_SNV    | c.35G>A        | p.(Gly12Asp)         | G12D       | 2    | 3213  | 30.19 |
| 151 | TERT    | ONCOGENE         | SENESCENCE             | chr5  | 1295228   | 1295228   | G           | A  | upstream     | NA                   | NA             | NA                   | 1          | 140  | 14.29 |       |
