# Supplementary material for: Prognostic value of tumor mutational burden in patients with oral cavity squamous cell carcinoma treated with upfront surgery
Source: PubMed Central journal article supplement — ESMO Open. 2021 Jun 9;6(4):100178. doi: 10.1016/j.esmoop.2021.100178 (PMC8207209; doi:10.1016/j.esmoop.2021.100178), 2021-06-09
Supplement: mmc10.pdf [file mmc10.pdf]

**Supplementary Table 3: Molecular alterations and their prognostic value.**

|                                                  | Patients (%) | Disease-free survival |           | Overall survival       |           |
|--------------------------------------------------|--------------|-----------------------|-----------|------------------------|-----------|
|                                                  |              | Recurrence (%)        | p-value*  | Death (%)              | p-value*  |
| <i>Total</i>                                     | 151 (100%)   | 50 (33%)              |           | 77 (51%)               |           |
| <b>Oncogenes</b>                                 |              |                       |           |                        |           |
| <i>HRAS</i>                                      |              |                       | 0.38 (NS) | 76 (99%)               | 0.21 (NS) |
| Wild type                                        | 145 (96%)    | 49 (98%)              |           | 1 (1%)                 |           |
| Mutated                                          | 6 (4%)       | 1 (2%)                |           |                        |           |
| <i>NFE2L2</i>                                    |              |                       | 0.80 (NS) |                        | 0.93 (NS) |
| Wild type                                        | 142 (94%)    | 47 (94%)              |           | 73 (95%)               |           |
| Mutated                                          | 9 (6%)       | 3 (6%)                |           | 4 (5%)                 |           |
| <i>PIK3CA</i>                                    |              |                       | 0.87 (NS) |                        | 0.64 (NS) |
| Wild type                                        | 130 (86%)    | 43 (86%)              |           | 65 (84%)               |           |
| Mutated                                          | 21 (14%)     | 7 (14%)               |           | 12 (16%)               |           |
| <i>TERT</i>                                      |              |                       | 0.30 (NS) |                        | 0.56 (NS) |
| Wild type                                        | 75 (50%)     | 21 (42%)              |           | 36 (47%)               |           |
| Mutated                                          | 76 (50%)     | 29 (58%)              |           | 41 (53%)               |           |
| <b>Tumor Suppressor Genes</b>                    |              |                       |           |                        |           |
| <i>CDKN2A</i>                                    |              |                       | 0.81 (NS) |                        | 0.75(NS)  |
| Wild type                                        | 113 (75%)    | 37 (74%)              |           | 59 (77%)               |           |
| Mutated                                          | 38 (25%)     | 13 (26%)              |           | 18 (23%)               |           |
| <i>FAT1</i>                                      |              |                       | 0.73 (NS) |                        | 0.36 (NS) |
| Wild type                                        | 125 (83%)    | 42 (84%)              |           | 67 (87%)               |           |
| Mutated                                          | 26 (17%)     | 8 (16%)               |           | 10 (13%)               |           |
| <i>FAT2</i>                                      |              |                       | 0.09 (NS) |                        | 0.06 (NS) |
| Wild type                                        | 142 (94%)    | 49 (98%)              |           | 75 (97%)               |           |
| Mutated                                          | 9 (6%)       | 1 (2%)                |           | 2 (3%)                 |           |
| <i>KMT2B</i>                                     |              |                       | 0.72 (NS) |                        | 0.62 (NS) |
| Wild type                                        | 143 (95%)    | 47 (94%)              |           | 74 (96%)               |           |
| Mutated                                          | 8 (5%)       | 3 (6%)                |           | 3 (4%)                 |           |
| <i>KMT2D</i>                                     |              |                       | 0.57 (NS) |                        | 0.95 (NS) |
| Wild type                                        | 137 (91%)    | 44 (8%)               |           | 69 (90%)               |           |
| Mutated                                          | 14 (9%)      | 6 (12%)               |           | 8 (10%)                |           |
| <i>TP53</i>                                      |              |                       | 0.53 (NS) |                        | 0.06 (NS) |
| Wild type                                        | 44 (29%)     | 13 (26%)              |           | 16 (21%)               |           |
| Mutated                                          | 107 (71%)    | 37 (74%)              |           | 61 (79% <sup>o</sup> ) |           |
| <i>CASP8</i>                                     |              |                       | 0.44 (NS) |                        | 0.44 (NS) |
| Wild type                                        | 145 (96%)    | 47 (94%)              |           | 75 (97%)               |           |
| Mutated                                          | 6 (4%)       | 3 (6%)                |           | 2 (3%)                 |           |
| <b>Both oncogenes and tumor suppressor genes</b> |              |                       |           |                        |           |
| <i>NOTCH1</i>                                    |              |                       | 0.88 (NS) |                        | 0.58 (NS) |
| Wild type                                        | 129 (85%)    | 42 (84%)              |           | 65 (84%)               |           |
| Mutated                                          | 22 (15%)     | 8 (16%)               |           | 12 (16%)               |           |
| <i>NSD1</i>                                      |              |                       | 0.32 (NS) |                        | 0.53 (NS) |
| Wild type                                        | 145 (96%)    | 49 (98%)              |           | 74 (96%)               |           |
| Mutated                                          | 6 (4%)       | 1 (2%)                |           | 3 (4%)                 |           |

Abbreviations: DFS, disease-free survival; OS, overall survival; NS, not significant

\* Log-rank test
