# Supplementary material for: Prognostic value of tumor mutational burden in patients with oral cavity squamous cell carcinoma treated with upfront surgery
Source: PubMed Central journal article supplement — ESMO Open. 2021 Jun 9;6(4):100178. doi: 10.1016/j.esmoop.2021.100178 (PMC8207209; doi:10.1016/j.esmoop.2021.100178), 2021-06-09
Supplement: mmc11.pdf [file mmc11.pdf]

**Supplementary Table 4: Molecular pathways and their prognostic value.**

|                              | Patients   | Disease-free survival |                  | Overall survival |                  |
|------------------------------|------------|-----------------------|------------------|------------------|------------------|
|                              |            | Recurrence (%)        | <i>p</i> -value* | Death (%)        | <i>p</i> -value* |
| <b>Total</b>                 | 151 (100%) | 50 (33%)              |                  | 77 (51%)         |                  |
| <b>Apoptosis</b>             |            |                       | 0.88 (NS)        |                  | 0.40 (NS)        |
| Unaltered                    | 141 (93%)  | 46 (92%)              |                  | 73 (95%)         |                  |
| Altered                      | 10 (7%)    | 4 (8%)                |                  | 4 (5%)           |                  |
| <b>Cell cycle</b>            |            |                       | 0.90 (NS)        |                  | 0.87 (NS)        |
| Unaltered                    | 112 (74%)  | 37 (74%)              |                  | 58 (75%)         |                  |
| Altered                      | 39 (26%)   | 13 (26%)              |                  | 19 (25%)         |                  |
| <b>Cell differentiation</b>  |            |                       | 0.12 (NS)        |                  | 0.07 (NS)        |
| Unaltered                    | 117 (77%)  | 42 (84%)              |                  | 65 (84%)         |                  |
| Altered                      | 34 (23%)   | 8 (16%)               |                  | 12 (16%)         |                  |
| <b>DNA repair</b>            |            |                       | 0.59 (NS)        |                  | 0.08 (NS)        |
| Unaltered                    | 134 (89%)  | 45 (90%)              |                  | 72 (94%)         |                  |
| Altered                      | 17 (11%)   | 5 (10%)               |                  | 5 (6%)           |                  |
| <b>Development</b>           |            |                       | 0.99 (NS)        |                  | 0.80 (NS)        |
| Unaltered                    | 117 (77%)  | 38 (76%)              |                  | 59 (77%)         |                  |
| Altered                      | 34 (23%)   | 12 (24%)              |                  | 18 (23%)         |                  |
| <b>Epigenetics</b>           |            |                       | 0.59 (NS)        |                  | 0.51 (NS)        |
| Unaltered                    | 100 (66%)  | 32 (64%)              |                  | 49 (63%)         |                  |
| Altered                      | 51 (34%)   | 18 (36%)              |                  | 28 (36%)         |                  |
| <b>Genome integrity</b>      |            |                       | 0.60 (NS)        |                  | 0.08 (NS)        |
| Unaltered                    | 43 (28%)   | 13 (26%)              |                  | 16 (21%)         |                  |
| Altered                      | 108 (72%)  | 37 (74%)              |                  | 61 (79%)         |                  |
| <b>Myc pathway</b>           |            |                       | 0.07 (NS)        |                  | 0.33 (NS)        |
| Unaltered                    | 149 (99%)  | 48 (96%)              |                  | 77 (100%)        |                  |
| Altered                      | 2 (1%)     | 2 (4%)                |                  | 0 (0%)           |                  |
| <b>Oxidative stress</b>      |            |                       | 0.50 (NS)        |                  | 0.70 (NS)        |
| Unaltered                    | 141 (93%)  | 46 (92%)              |                  | 72 (94%)         |                  |
| Altered                      | 10 (7%)    | 4 (8%)                |                  | 5 (6%)           |                  |
| <b>PI3K pathway</b>          |            |                       | 0.80 (NS)        |                  | 0.51 (NS)        |
| Unaltered                    | 126 (83%)  | 41 (82%)              |                  | 63 (82%)         |                  |
| Altered                      | 25 (17%)   | 9 (18%)               |                  | 14 (18%)         |                  |
| <b>RTK/RAS</b>               |            |                       | 0.27 (NS)        |                  | 0.06 (NS)        |
| Unaltered                    | 137 (91%)  | 47 (94%)              |                  | 74 (96%)         |                  |
| Altered                      | 14 (9%)    | 3 (6%)                |                  | 3 (4%)           |                  |
| <b>Senescence</b>            |            |                       | 0.30 (NS)        |                  | 0.56 (NS)        |
| Unaltered                    | 75 (50%)   | 21 (42%)              |                  | 36 (47%)         |                  |
| Altered                      | 76 (50%)   | 29 (58%)              |                  | 41 (53%)         |                  |
| <b>TGFβ pathway</b>          |            |                       | <b>0.02</b>      |                  | <b>0.01</b>      |
| Unaltered                    | 145 (96%)  | 46 (92%)              |                  | 72 (94%)         |                  |
| Altered                      | 6 (4%)     | 4 (8%)                |                  | 5 (6%)           |                  |
| <b>Transcription factors</b> |            |                       | 0.35 (NS)        |                  | 0.13 (NS)        |
| Unaltered                    | 138 (91%)  | 47 (94%)              |                  | 73 (95%)         |                  |
| Altered                      | 13 (9%)    | 3 (6%)                |                  | 4 (5%)           |                  |
| <b>Immunity</b>              |            |                       | 0.40 (NS)        |                  | 0.34 (NS)        |
| Unaltered                    | 147 (97%)  | 50 (100%)             |                  | 77 (100%)        |                  |
| Altered                      | 4 (3%)     | 0 (0%)                |                  | 0 (0%)           |                  |
| <b>Other</b>                 |            |                       | 0.06 (NS)        |                  | 0.16 (NS)        |
| Unaltered                    | 120 (79%)  | 44 (88%)              |                  | 64 (83%)         |                  |
| Altered                      | 31 (21%)   | 6 (12%)               |                  | 13 (17%)         |                  |

Abbreviations: DFS, disease-free survival; OS, overall survival; NS, not significant; RTK, receptor tyrosine kinase

\* Log-rank test
