# Supplementary material for: Prognostic value of tumor mutational burden in patients with oral cavity squamous cell carcinoma treated with upfront surgery
Source: PubMed Central journal article supplement — ESMO Open. 2021 Jun 9;6(4):100178. doi: 10.1016/j.esmoop.2021.100178 (PMC8207209; doi:10.1016/j.esmoop.2021.100178), 2021-06-09
Supplement: mmc12.pdf [file mmc12.pdf]

**Supplementary Table 5:** Tumor mutational burden value per patient

| Patient number | TMB mut/mb | TMB Cut-off 10% | TMB Cut-off 20% |
|----------------|------------|-----------------|-----------------|
| 1              | 6.3        | 0               | 0               |
| 2              | 9.45       | 0               | 0               |
| 3              | 20.8       | 1               | 1               |
| 4              | 9.45       | 0               | 0               |
| 5              | 6.3        | 0               | 0               |
| 6              | 10.08      | 0               | 0               |
| 7              | 9.45       | 0               | 0               |
| 8              | 8.19       | 0               | 0               |
| 9              | 8.19       | 0               | 0               |
| 10             | 6.3        | 0               | 0               |
| 11             | 6.3        | 0               | 0               |
| 12             | 16.39      | 1               | 1               |
| 13             | 6.3        | 0               | 0               |
| 14             | 8.82       | 0               | 0               |
| 15             | 5.67       | 0               | 0               |
| 16             | 10.08      | 0               | 0               |
| 17             | 8.19       | 0               | 0               |
| 18             | 8.19       | 0               | 0               |
| 19             | 6.3        | 0               | 0               |
| 20             | 5.04       | 0               | 0               |
| 21             | 6.3        | 0               | 0               |
| 22             | 6.93       | 0               | 0               |
| 23             | 10.08      | 0               | 0               |
| 24             | 3.15       | 0               | 0               |
| 25             | 13.23      | 0               | 1               |
| 26             | 5.67       | 0               | 0               |
| 27             | 13.23      | 0               | 1               |
| 28             | 8.19       | 0               | 0               |
| 29             | 8.19       | 0               | 0               |
| 30             | 7.56       | 0               | 0               |
| 31             | 10.71      | 0               | 0               |
| 32             | 17.02      | 1               | 1               |
| 33             | 18.91      | 1               | 1               |
| 34             | 10.71      | 0               | 0               |
| 35             | 12.6       | 0               | 1               |
| 36             | 5.04       | 0               | 0               |
| 37             | 6.3        | 0               | 0               |
| 38             | 8.19       | 0               | 0               |
| 39             | 8.19       | 0               | 0               |
| 40             | 8.82       | 0               | 0               |
| 41             | 22.06      | 1               | 1               |
| 42             | 6.93       | 0               | 0               |
| 43             | 21.43      | 1               | 1               |
| 44             | 11.34      | 0               | 0               |
| 45             | 20.8       | 1               | 1               |

|    |        |   |   |
|----|--------|---|---|
| 46 | 8.19   | 0 | 0 |
| 47 | 18.28  | 1 | 1 |
| 48 | 17.02  | 1 | 1 |
| 49 | 7.56   | 0 | 0 |
| 50 | 7.56   | 0 | 0 |
| 51 | 13.23  | 0 | 1 |
| 52 | 6.3    | 0 | 0 |
| 53 | 7.56   | 0 | 0 |
| 54 | 18.91  | 1 | 1 |
| 55 | 3.78   | 0 | 0 |
| 56 | 7.56   | 0 | 0 |
| 57 | 7.56   | 0 | 0 |
| 58 | 6.3    | 0 | 0 |
| 59 | 6.3    | 0 | 0 |
| 60 | 6.93   | 0 | 0 |
| 61 | 5.67   | 0 | 0 |
| 62 | 7.56   | 0 | 0 |
| 63 | 5.04   | 0 | 0 |
| 64 | 6.3    | 0 | 0 |
| 65 | 6.3    | 0 | 0 |
| 66 | 6.3    | 0 | 0 |
| 67 | 5.04   | 0 | 0 |
| 68 | 5.04   | 0 | 0 |
| 69 | 5.04   | 0 | 0 |
| 70 | 2.52   | 0 | 0 |
| 71 | 4.41   | 0 | 0 |
| 72 | 11.34  | 0 | 0 |
| 73 | 8.19   | 0 | 0 |
| 74 | 10.08  | 0 | 0 |
| 75 | 5.67   | 0 | 0 |
| 76 | 10.08  | 0 | 0 |
| 77 | 8.19   | 0 | 0 |
| 78 | 5.67   | 0 | 0 |
| 79 | 9.45   | 0 | 0 |
| 80 | 6.93   | 0 | 0 |
| 81 | 3.78   | 0 | 0 |
| 82 | 8.19   | 0 | 0 |
| 83 | 9.45   | 0 | 0 |
| 84 | 5.67   | 0 | 0 |
| 85 | 9.45   | 0 | 0 |
| 86 | 8.19   | 0 | 0 |
| 87 | 13.23  | 0 | 1 |
| 88 | 7.56   | 0 | 0 |
| 89 | 8.19   | 0 | 0 |
| 90 | 6.3    | 0 | 0 |
| 91 | 54.2   | 1 | 1 |
| 92 | 12.6   | 0 | 1 |
| 93 | 126.05 | 1 | 1 |
| 94 | 14.5   | 0 | 1 |

|     |       |   |   |
|-----|-------|---|---|
| 95  | 8.19  | 0 | 0 |
| 96  | 10.71 | 0 | 0 |
| 97  | 14.5  | 0 | 1 |
| 98  | 11.97 | 0 | 1 |
| 99  | 7.56  | 0 | 0 |
| 100 | 15.13 | 1 | 1 |
| 101 | 8.82  | 0 | 0 |
| 102 | 5.67  | 0 | 0 |
| 103 | 13.87 | 0 | 1 |
| 104 | 9.45  | 0 | 0 |
| 105 | 12.6  | 0 | 1 |
| 106 | 6.3   | 0 | 0 |
| 107 | 6.3   | 0 | 0 |
| 108 | 4.41  | 0 | 0 |
| 109 | 11.97 | 0 | 1 |
| 110 | 9.45  | 0 | 0 |
| 111 | 4.41  | 0 | 0 |
| 112 | 7.56  | 0 | 0 |
| 113 | 8.19  | 0 | 0 |
| 114 | 10.71 | 0 | 0 |
| 115 | 11.34 | 0 | 0 |
| 116 | 9.45  | 0 | 0 |
| 117 | 13.23 | 0 | 1 |
| 118 | 7.56  | 0 | 0 |
| 119 | 9.45  | 0 | 0 |
| 120 | 10.71 | 0 | 0 |
| 121 | 9.45  | 0 | 0 |
| 122 | 7.56  | 0 | 0 |
| 123 | 20.8  | 1 | 1 |
| 124 | 9.45  | 0 | 0 |
| 125 | 3.15  | 0 | 0 |
| 126 | 6.93  | 0 | 0 |
| 127 | 11.34 | 0 | 0 |
| 128 | 6.93  | 0 | 0 |
| 129 | 3.78  | 0 | 0 |
| 130 | 3.78  | 0 | 0 |
| 131 | 13.23 | 0 | 1 |
| 132 | 8.82  | 0 | 0 |
| 133 | 5.67  | 0 | 0 |
| 134 | 7.56  | 0 | 0 |
| 135 | 10.71 | 0 | 0 |
| 136 | 11.34 | 0 | 0 |
| 137 | 7.56  | 0 | 0 |
| 138 | 8.82  | 0 | 0 |
| 139 | 4.41  | 0 | 0 |
| 140 | 3.78  | 0 | 0 |
| 141 | 13.87 | 0 | 1 |
| 142 | 7.56  | 0 | 0 |
| 143 | 5.04  | 0 | 0 |

|     |       |   |   |
|-----|-------|---|---|
| 144 | 3.78  | 0 | 0 |
| 145 | 6.3   | 0 | 0 |
| 146 | 7.56  | 0 | 0 |
| 147 | 5.67  | 0 | 0 |
| 148 | 17.02 | 1 | 1 |
| 149 | 4.41  | 0 | 0 |
| 150 | 5.04  | 0 | 0 |
| 151 | 11.34 | 0 | 0 |
