# Supplementary figures and images for: Prognostic value of tumor mutational burden in patients with oral cavity squamous cell carcinoma treated with upfront surgery
Source: PubMed Central journal article supplement — ESMO Open. 2021 Jun 9;6(4):100178. doi: 10.1016/j.esmoop.2021.100178 (PMC8207209; doi:10.1016/j.esmoop.2021.100178), 2021-06-09

A

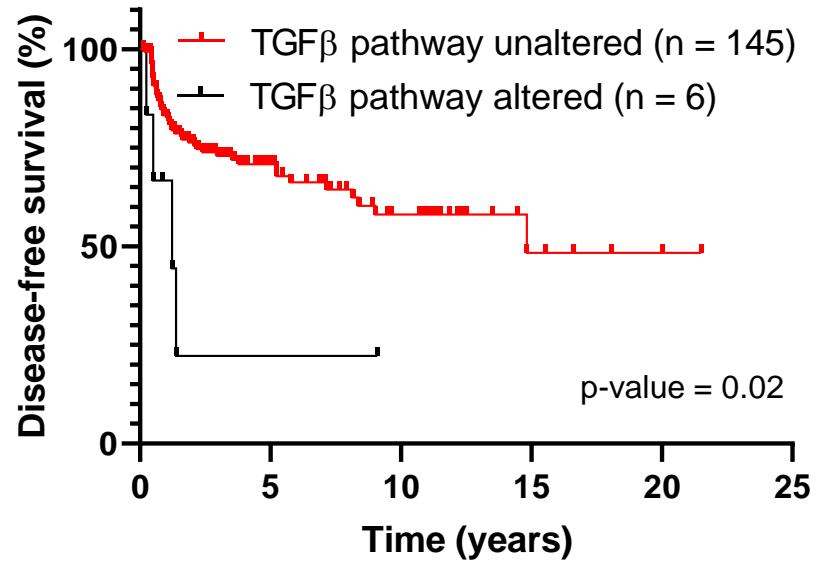

B

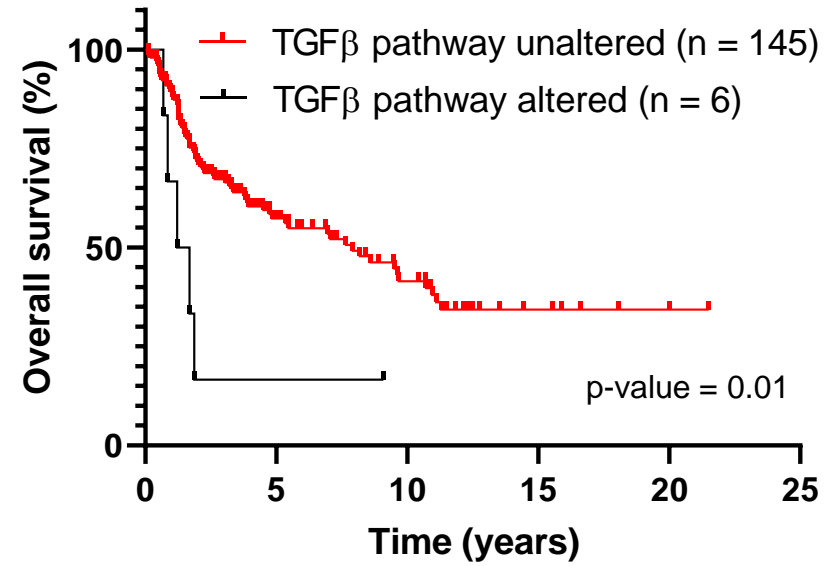

*Supplementary Figure 2*

Supplement: mmc2.pdf [file mmc2.pdf]

A

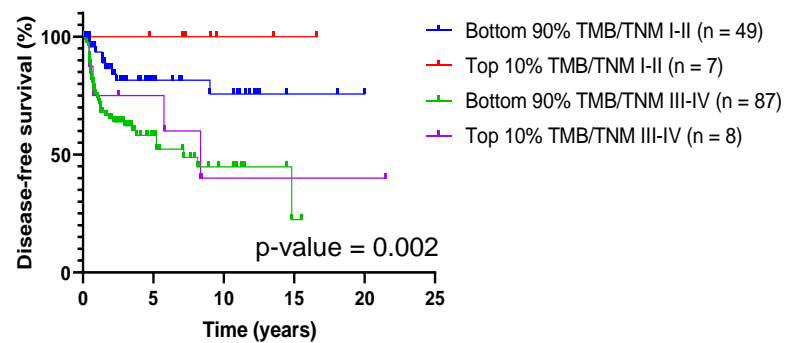

B

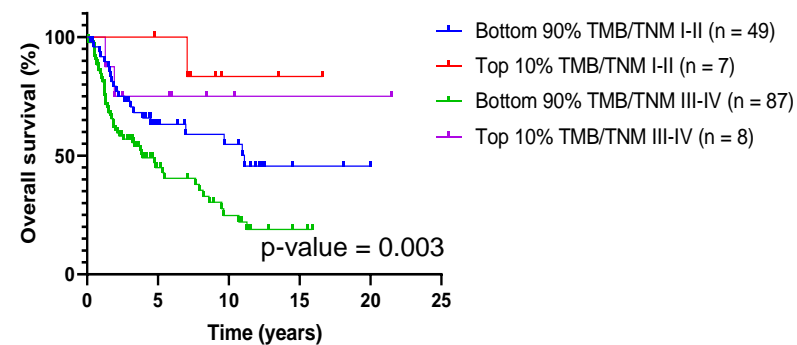

C

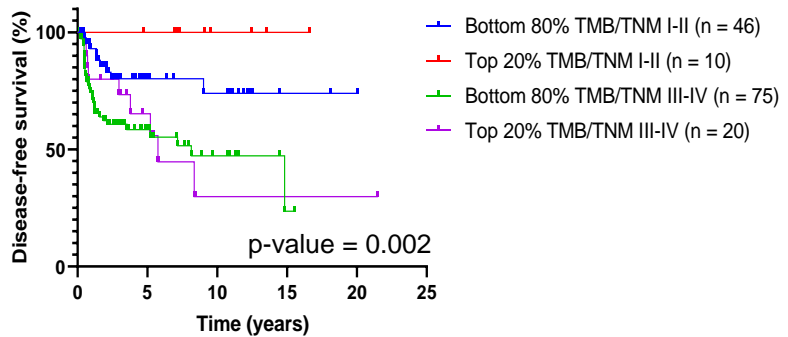

D

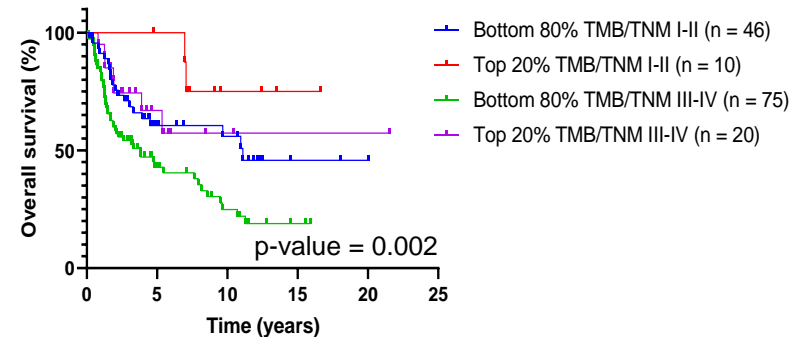

Supplement: mmc7.pdf [file mmc7.pdf]
